# Supplementary material for: Total synthesis of spiruchostatin B, a potent histone deacetylase inhibitor, from a microorganism
Source: Royal Society of Chemistry journal article supplement (doi:10.1039/b718310k), 2008-01-01
Supplement: b718310k.pdf [file b718310k.pdf]

– Electronic Supplementary Information (ESI) –

( Experimental Procedures, Characterization Data, and Copies of  $^1\text{H}$  and  $^{13}\text{C}$  NMR Spectra )

**Total Synthesis of Spiruchostatin B, a Potent Histone Deacetylase Inhibitor,  
from a Microorganism**

Toshiya Takizawa, Kazuhiro Watanabe, Koichi Narita, Takamasa Oguchi,

Hideki Abe, and Tadashi Katoh\*

*Laboratory of Synthetic Medicinal Chemistry, Department of Chemical Pharmaceutical Science,  
Tohoku Pharmaceutical University,  
4-4-1 Komatsushima, Aoba-ku, Sendai 981-8558, Japan*

*E-mail: katoh@tohoku-pharm.ac.jp*

|                                                                              |          |
|------------------------------------------------------------------------------|----------|
| General techniques                                                           | S4       |
| Procedures and characterization data                                         | S5 – S16 |
| Synthesis of compound <b>13</b>                                              | S5       |
| Synthesis of compound <b>14</b>                                              | S5       |
| Synthesis of compound <b>15</b>                                              | S6       |
| Synthesis of compound <b>16</b>                                              | S7       |
| Synthesis of compound <b>5</b>                                               | S8       |
| Synthesis of compound <b>18</b>                                              | S8       |
| Synthesis of compound <b>10</b>                                              | S9       |
| Synthesis of compound <b>19</b>                                              | S10      |
| Synthesis of compound <b>20a</b> and <b>20b</b>                              | S10      |
| Synthesis of compound <b>21</b>                                              | S11      |
| Synthesis of compound <b>22</b>                                              | S12      |
| Synthesis of compound <b>6</b>                                               | S12      |
| Synthesis of compound <b>4</b>                                               | S13      |
| Synthesis of compound <b>23</b>                                              | S14      |
| Synthesis of spiruchostatin B ( <b>2</b> )                                   | S15      |
| Synthesis of 5''- <i>epi</i> -spiruchostatin B (5''- <i>epi</i> - <b>2</b> ) | S16      |

|                                                                                              |           |
|----------------------------------------------------------------------------------------------|-----------|
| Spectra of the corresponding compounds                                                       | S16 – S33 |
| <sup>1</sup> H and <sup>13</sup> C NMR Spectra for compound <b>13</b>                        | S17       |
| <sup>1</sup> H and <sup>13</sup> C NMR Spectra for compound <b>14</b>                        | S18       |
| <sup>1</sup> H and <sup>13</sup> C NMR Spectra for compound <b>16</b>                        | S19       |
| <sup>1</sup> H and <sup>13</sup> C NMR Spectra for compound <b>5</b>                         | S20       |
| <sup>1</sup> H and <sup>13</sup> C NMR Spectra for compound <b>18</b>                        | S21       |
| <sup>1</sup> H and <sup>13</sup> C NMR Spectra for compound <b>10</b>                        | S22       |
| <sup>1</sup> H and <sup>13</sup> C NMR Spectra for compound <b>19</b>                        | S23       |
| <sup>1</sup> H and <sup>13</sup> C NMR Spectra for compound <b>20a</b>                       | S24       |
| <sup>1</sup> H and <sup>13</sup> C NMR Spectra for compound <b>20b</b>                       | S25       |
| <sup>1</sup> H and <sup>13</sup> C NMR Spectra for compound <b>21</b>                        | S26       |
| <sup>1</sup> H and <sup>13</sup> C NMR Spectra for compound <b>22</b>                        | S27       |
| <sup>1</sup> H and <sup>13</sup> C NMR Spectra for compound <b>6</b>                         | S28       |
| <sup>1</sup> H and <sup>13</sup> C NMR Spectra for compound <b>4</b>                         | S29       |
| <sup>1</sup> H and <sup>13</sup> C NMR Spectra for compound <b>23</b>                        | S30       |
| <sup>1</sup> H and <sup>13</sup> C NMR Spectra for spiruchostatin B ( <b>2</b> ) (synthetic) | S31       |
| <sup>1</sup> H and <sup>13</sup> C NMR Spectra for spiruchostatin B ( <b>2</b> ) (natural)   | S32       |

<sup>1</sup>H and <sup>13</sup>C NMR Spectra for 5''-*epi*-spiruchostatin B (5''-*epi*-2) · · · · ·

S33

**General Techniques.**

All reactions involving air- and moisture-sensitive reagents were carried out using oven dried glassware and standard syringe-septum cap techniques. Routine monitorings of reaction were carried out using glass-supported Merck silica gel 60 F<sub>254</sub> TLC plates. Flash column chromatography was performed on Kanto Chemical Silica Gel 60N (spherical, neutral 40–50 μm) with the solvents indicated.

All solvents and reagents were used as supplied with following exceptions. Tetrahydrofuran (THF) and Et<sub>2</sub>O were freshly distilled from Na metal/benzophenone under argon. Toluene was distilled from Na metal under argon. *N,N*-Dimethylformamide (DMF), dimethyl sulfoxide (DMSO), CH<sub>2</sub>Cl<sub>2</sub>, MeCN, pyridine, *N,N*-diisopropylamine, and hexane were distilled from calcium hydride under argon.

Measurements of optical rotations were performed with a JASCO DIP-370 automatic digital polarimeter. Melting points were taken on a Yanaco MP-3 micro melting point apparatus and are uncorrected. <sup>1</sup>H and <sup>13</sup>C NMR spectra were measured with a JEOL AL-400 (400 MHz) spectrometer. Chemical shifts were expressed in ppm using Me<sub>4</sub>Si (δ=0) as an internal standard. The following abbreviations are used: singlet (s), doublet (d), triplet (t), quartet (q), sextet (sext), multiplet (m), and broad (br). Infrared (IR) spectral measurements were carried out with a JASCO FT/IR-4100 spectrometer. Low- and High-resolution mass (HRMS) spectra were measured on a JEOL JMS-DX 303/JMA-DA 5000 SYSTEM high resolution mass spectrometer.

**(3*R*,4*R*,5*S*)-Ethyl 4-(*tert*-butoxycarbonylamino)-3-hydroxy-5-methylheptanoate (13) and its (3*S*,4*R*,5*S*)-isomer (14).**

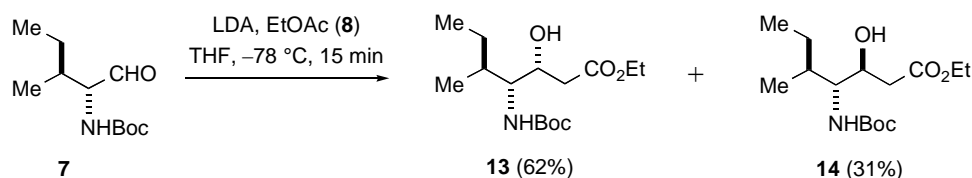

A solution of EtOAc (**8**) (2.1 mL, 19 mmol) was added slowly to a stirred solution of lithium diisopropylamide (LDA) (19 mmol) [prepared from *n*-BuLi in hexane (1.6 M solution, 12.6 mL, 21 mmol) and *i*-Pr<sub>2</sub>NH (2.74 mL, 19 mmol)] in dry THF (7 mL) at -78 °C. After 10 min, (2*R*,3*S*)-*N*-(*tert*-butoxycarbonyl)-*D*-allo-isoleucinal (**7**) (2.46 g, 11 mmol) in dry THF (10 mL) was added to the above mixture at -78 °C. After 15 min, the reaction was quenched with 2 M HCl (10 mL) at -78 °C, and the resulting mixture was extracted with Et<sub>2</sub>O (2 x 40 mL). The combined extracts were washed with saturated aqueous NaHCO<sub>3</sub> (2 x 20 mL) and brine (2 x 20 mL), then dried over Na<sub>2</sub>SO<sub>4</sub>. Concentration of the solvent *in vacuo* afforded a residue, which was purified by column chromatography (hexane/EtOAc, 5:1□4:1) to **13** (3.57 g, 62%, less polar) and **14** (1.79 g, 31%, more polar).

**13**: colorless oil,  $[\alpha]_D^{25} +26.9$  (*c* 2.00, MeOH); IR (neat): 3447, 1734, 1686, 1076 cm<sup>-1</sup>; <sup>1</sup>H NMR (400 MHz, CDCl<sub>3</sub>): δ 0.91 (6H, t, *J* = 6.8 Hz), 1.16–1.22 (1H, m), 1.27 (3H, t, *J* = 7.3 Hz), 1.44 (9H, s), 1.48–1.73 (2H, m), 2.45 (1H, dd, *J* = 2.9, 16.5 Hz), 2.55 (1H, dd, *J* = 9.8, 16.5 Hz), 3.32 (2H, d, *J* = 3.4 Hz), 4.16 (2H, dd, *J* = 7.3, 14.1 Hz), 4.21–4.24 (1H, m), 4.87 (1H, d, *J* = 10.2 Hz); <sup>13</sup>C NMR (100 MHz, CDCl<sub>3</sub>): δ 11.0, 14.1, 15.3, 26.2, 28.4 (3 C), 36.7, 39.2, 57.6, 60.8, 67.6, 79.1, 156.4, 173.5; HRMS (EI) calcd for C<sub>15</sub>H<sub>29</sub>NO<sub>5</sub> (M<sup>+</sup>), 303.2046, found 303.2032.

**14**: colorless oil,  $[\alpha]_D^{25} -6.4$  (*c* 0.99, MeOH); IR (neat): 3451, 1714, 1695, 1073 cm<sup>-1</sup>; <sup>1</sup>H NMR (400 MHz, CDCl<sub>3</sub>): δ 0.86 (3H, d, *J* = 6.8 Hz), 0.92 (3H, t, *J* = 7.3 Hz), 1.21–1.46 (2H, m), 1.28 (3H, t, *J* = 7.3 Hz), 1.44 (9H, s), 1.91–1.98 (1H, m), 2.47 (1H, dd, *J* = 9.2, 17.5 Hz), 2.61 (1H, dd, *J* = 2.9, 16.5 Hz), 3.31 (1H, d, *J* = 4.9 Hz), 3.62–3.67 (1H, m), 3.88–3.94 (1H, m), 4.14–4.22 (2H, m), 4.43 (1H, d, *J* = 10.2 Hz); <sup>13</sup>C NMR (100 MHz, CDCl<sub>3</sub>): δ 11.7, 13.2, 14.1, 27.1, 28.3 (3 C), 33.9, 38.6, 56.6, 60.7, 69.1, 79.4, 156.1, 173.4; HRMS (EI) calcd for C<sub>15</sub>H<sub>29</sub>NO<sub>5</sub> (M<sup>+</sup>), 303.2046, found 303.2032.

**Conversion of 13 to 14.**

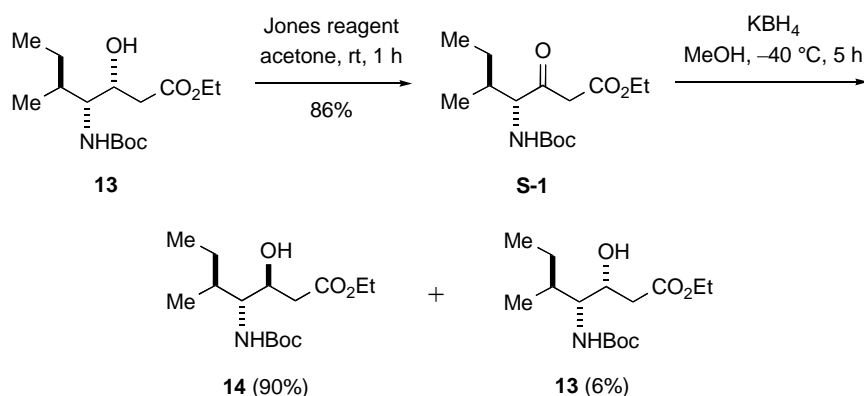

2.6 M Jones reagent (4.95 mL, 13 mmol) was added dropwise to a stirred solution of **13** (2.67 g, 8.8 mmol) in acetone (90 mL) at room temperature. After 1 h, the mixture was diluted with Et<sub>2</sub>O (160 mL). The organic layer was washed with saturated aqueous NaHCO<sub>3</sub> (2 x 30 mL) and brine (2 x 30 mL), then dried over Na<sub>2</sub>SO<sub>4</sub>. Concentration of the solvent *in vacuo* afforded a residue, which was purified by column chromatography (hexane/EtOAc, 10:1□8:1) to give **S-1** (2.28 g, 86%) as a colorless oil.

KBH<sub>4</sub> (1.84 g, 34 mmol) was added in small portions to a stirred solution of **S-1** (2.06 g, 6.8 mmol) in MeOH (70 mL) at -40°C. After 5 h, the reaction was quenched with 10% aqueous citric acid at 0°C (adjusted pH 3). After concentration of the solvent *in vacuo*, water (30 mL) was added, and the resulting mixture was extracted with CH<sub>2</sub>Cl<sub>2</sub> (4 x 20 mL). The combined extracts were washed with brine (2 x 20 mL), then dried over Na<sub>2</sub>SO<sub>4</sub>. Concentration of the solvent *in vacuo* afforded a residue, which was purified by column chromatography (hexane/EtOAc, 5:1□4:1) to give **14** (1.86 g, 90%) and **13** (124 mg, 6%). The IR, <sup>1</sup>H and <sup>13</sup>C NMR, mass spectra of these samples were identical with those recorded for **13** and **14**.

**(3S,4R,5S)-Allyl 4-amino-3-(tert-butyldimethylsilyloxy)-5-methylheptanoate (15).**

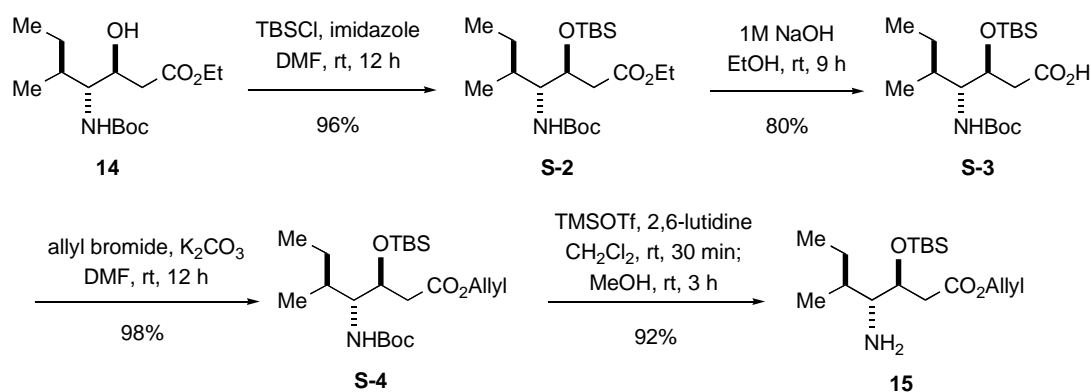

*tert*-Butyldimethylsilyl chloride (TBSCl) (2.76 g, 18 mmol) was added to stirred solution of **14** (1.86 g, 6.1 mmol) in dry DMF (50 mL) containing imidazole (2.50 g, 36 mmol) at room temperature. After 12 h, the reaction mixture was diluted with Et<sub>2</sub>O (120 mL), and the organic layer was washed with brine (2 x 30 mL), then dried over Na<sub>2</sub>SO<sub>4</sub>. Concentration of the solvent *in vacuo* afforded a residue, which was purified by column chromatography (hexane/EtOAc, 15:1□10:1) to give **S-2** (2.47 g, 96%) as a colorless oil.

1 M NaOH (30.0 mL, 30 mmol) was added dropwise to a stirred solution of **S-2** (2.47 g, 5.9 mmol) in EtOH (60 mL) at room temperature. After 9 h, the reaction was quenched 10% aqueous HCl (50 mL) at 0°C, and the resulting mixture was extracted with EtOAc (3 x 50 mL). The combined extracts were washed with brine (2 x 30 mL), then dried over Na<sub>2</sub>SO<sub>4</sub>. Concentration of the solvent *in vacuo* afforded a residue, which was purified by column chromatography (hexane/EtOAc, 10:1□2:1) to give **S-3** (1.84 g, 80%) as a white amorphous solid.

Allyl bromide (0.79 mL, 9.5 mmol) was added to stirred solution of **S-3** (1.84 g, 4.7 mmol) in dry DMF (50 mL) containing  $K_2CO_3$  (1.96 g, 14 mmol) at room temperature. After 12 h, the reaction was quenched with water (20 mL) at room temperature, and the resulting mixture was extracted with  $Et_2O$  (4 x 40 mL). The combined extracts were washed with saturated aqueous  $NH_4Cl$  (2 x 30 mL) and brine (2 x 30 mL), then dried over  $Na_2SO_4$ . Concentration of the solvent *in vacuo* afforded a residue, which was purified by column chromatography (hexane/ $EtOAc$ , 10:1) to give **S-4** (1.99 g, 98%) as a pale yellow oil.

Trimethylsilyl trifluoromethanesulfonate (TMSOTf) (0.87 mL, 4.8 mmol) was added to a stirred solution of **S-4** (208 mg, 0.48 mmol) in dry  $CH_2Cl_2$  (5 mL) in the presence of 2,6-lutidine (0.68 mL, 5.8 mmol) at room temperature. After 30 min, MeOH (1.0 mL) was added to the reaction mixture at  $0^\circ C$ . After stirring at room temperature for 3 h, the reaction mixture was concentrated *in vacuo* to afford a residue, which was purified by column chromatography (hexane- $EtOAc$ , 3:1) to give **15** (145.4 mg, 92%) as a colorless oil. This material was immediately used for the next reaction due to its instability (prone to form a  $\gamma$ -lactam ring).

**(3S,4R,5S)-Allyl 4-[(S)-2-(tert-butoxycarbonylamino)-3-(tritylthio)propanamido]-3-(tert-butyldimethylsilyloxy)-5-methylheptanoate (16).**

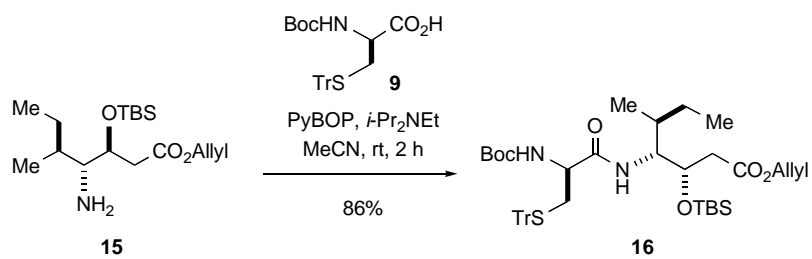

*N,N*-Diisopropylethylamine (0.19 mL, 1.1 mmol) was added dropwise to a stirred solution of *N*-(tert-butoxycarbonyl)-*S*-trityl-D-cysteine (**9**)<sup>9</sup> (241 mg, 0.52 mmol) and **15** (159 mg, 0.43 mmol) in dry MeCN (5 mL) containing (benzotriazol-1-yloxy)tripyrrolidinophosphonium hexafluorophosphate (PyBOP) (293 mg, 0.56 mmol) at room temperature under argon. After 2 h, the mixture was diluted with  $Et_2O$  (60 mL), and the organic layer was washed with 3% aqueous HCl (2 x 20 mL), saturated aqueous  $NaHCO_3$  (2 x 20 mL) and brine (2 x 20 mL), then dried over  $Na_2SO_4$ . Concentration of the solvent *in vacuo* to afford a residue, which was purified by column chromatography (hexane/ $EtOAc$ , 8:1) to give **16** (289 mg, 86%) as a colorless oil.  $[\alpha]_D^{25} +5.7$  (*c* 1.01,  $CHCl_3$ ); IR (neat) : 1734, 1693, 1671, 1594, 776, 743  $cm^{-1}$ ;  $^1H$  NMR (400 MHz,  $CDCl_3$ ):  $\delta$  0.01 (3H, s), 0.06 (3H, s), 0.84 (9H, s), 0.81–0.86 (6H, m), 1.04–1.14 (1H, m), 1.18–1.26 (1H, m), 1.39 (9H, s), 1.77–1.82 (1H, m), 2.43 (1H, dd,  $J = 6.8, 16.1$  Hz), 2.54 (2H, dd,  $J = 4.8, 16.1$  Hz), 2.70 (1H, dd,  $J = 7.3, 12.6$  Hz), 3.74 (1H, dd,  $J = 6.8, 13.1$  Hz), 3.90–3.96 (1H, m), 4.12 (1H, dd,  $J = 6.8, 11.6$  Hz), 4.50 (2H, ddd,  $J = 5.8, 13.1, 24.4$  Hz), 4.67 (1H, br d,  $J = 6.8$  Hz), 5.20 (1H, d,  $J = 10.2$  Hz), 5.28 (1H, d,  $J = 17.1$  Hz), 5.82–5.91 (1H, m), 6.07 (1H, br d,  $J = 9.3$  Hz), 7.19–7.45 (15H, m);  $^{13}C$  NMR (100 MHz,  $CDCl_3$ ):  $\delta$  -4.8, -4.5, 11.8, 13.5, 17.9 (2 C), 25.8 (3 C), 27.3, 28.3 (3 C), 32.9, 34.0, 40.3, 53.7, 55.8, 65.2, 67.1, 69.8, 80.3, 118.4, 126.8 (3 C), 128.0 (6 C), 129.6 (6 C), 132.0, 144.5 (2 C), 155.5, 170.5, 171.5; HRMS (FAB<sup>+</sup>) calcd for  $C_{44}H_{63}N_2O_6SSi$  ( $M^+ + 1$ ), 775.4176, found 775.4162.

**(3*S*,4*R*,5*S*)-Allyl 4-[(*S*)-2-amino-3-(tritylthio)propanamido]-3-(*tert*-butyldimethylsilyloxy)-5-methylheptanoate (5).**

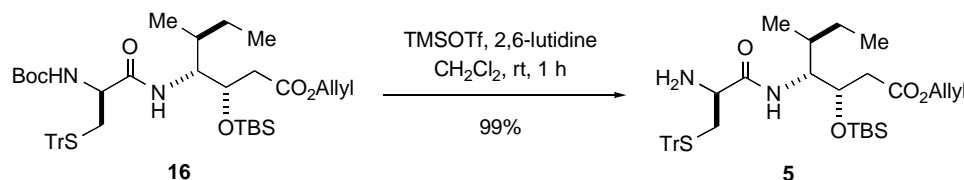

Trimethylsilyl trifluoromethanesulfonate (TMSOTf) (1.26 mL, 6.9 mmol) was added dropwise to a stirred solution of **16** (675 mg, 0.87 mmol) in CH<sub>2</sub>Cl<sub>2</sub> (20 mL) containing 2,6-lutidine (1.01 mL, 8.7 mmol) at room temperature. After 1 h, MeOH (1.2 mL) was added to the reaction mixture at 0°C. After 1 h, the mixture was concentrated *in vacuo* to afford a residue, which was purified by column chromatography (hexane/EtOAc, 2:1→1:1) to give **5** (581 mg, 99%) as a white amorphous solid.  $[\alpha]_D^{25} +1.87$  (*c* 0.97, CHCl<sub>3</sub>); IR (neat) : 1734, 1675, 1594, 1255, 777, 743 cm<sup>-1</sup>; <sup>1</sup>H NMR (400 MHz, CDCl<sub>3</sub>): δ 0.02 (3H, s), 0.05 (3H, s), 0.85 (9H, s), 0.79–0.88 (6H, m), 1.00–1.12 (1H, m), 1.16–1.26 (2H, m), 1.39 (2H, brs), 1.75–1.81 (1H, m), 2.43 (1H, dd, *J* = 5.8, 16.0 Hz), 2.49–2.57 (2H, m), 2.69 (1H, dd, *J* = 3.9, 12.1 Hz), 3.08 (1H, dd, *J* = 3.9, 8.1 Hz), 3.87–3.92 (1H, m), 4.13 (1H, dd, *J* = 5.8, 13.2 Hz), 4.51 (2H, d, *J* = 5.8 Hz), 5.24 (1H, d, *J* = 16.0 Hz), 5.29 (1H, d, *J* = 16.0 Hz), 5.83–5.93 (1H, m), 7.18–7.47 (15H, m); <sup>13</sup>C NMR (100 MHz, CDCl<sub>3</sub>): δ -4.9, -4.5, 11.8, 13.8, 17.9, 25.8 (3 C), 27.5, 29.7, 34.1, 37.3, 40.6, 53.9, 55.6, 65.2, 66.9, 69.9, 118.4, 126.7 (3 C), 127.9 (6 C), 129.6 (6 C), 132.0, 144.6 (2 C), 171.5, 172.7; HRMS (FAB<sup>+</sup>) calcd for C<sub>39</sub>H<sub>55</sub>N<sub>2</sub>O<sub>4</sub>SSi (M<sup>+</sup>+1), 675.3652, found 675.3664.

**5-[3-(4-Methoxybenzyloxy)propylthio]-1-phenyl-1*H*-tetrazole (18).**

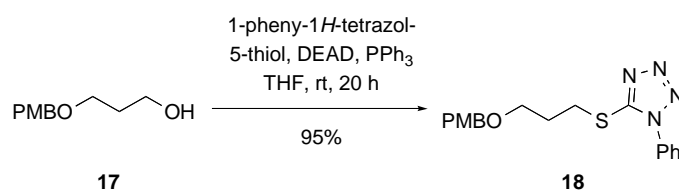

Diethyl azodicarboxylate (DEAD) in THF (2.2M in solution, 23.4 mL, 52 mmol) was added dropwise to a stirred solution of 3-(4-methoxybenzyloxy)propan-1-ol (**17**) (9.18 g, 47 mmol) in dry THF (500 mL) containing Ph<sub>3</sub>P (13.5 g, 52 mmol) and 1-phenyl-1*H*-tetrazol-5-thiol (9.17 g, 52 mmol) at room temperature under argon. After 5 h, the reaction mixture was concentrated *in vacuo* to afford a residue, which was purified by column chromatography (hexane/EtOAc, 2:1) to give **18** (15.8 g, 95%) as a white amorphous solid. IR (neat): 2857, 2546, 2347, 1596, 761, 694, 636 cm<sup>-1</sup>; <sup>1</sup>H NMR (400 MHz, CDCl<sub>3</sub>): δ 2.13 (2H, ddd, *J* = 5.8, 6.9, 13.2 Hz), 3.49 (2H, t, *J* = 6.9 Hz), 3.58 (2H, t, *J* = 5.8 Hz), 3.79 (3H, s), 4.43 (2H, s), 6.85–6.88 (2H, m), 7.23–7.26 (2H, m), 7.52–7.59 (5H, m); <sup>13</sup>C NMR (100 MHz, CDCl<sub>3</sub>): δ



29.2, 30.3, 55.2, 67.6, 72.6, 77.2, 113.8, 123.8, 129.3 (3 C), 129.7 (2 C), 130.0, 130.2, 133.7, 154.3, 159.2; HRMS (EI) calcd for C<sub>18</sub>H<sub>20</sub>N<sub>4</sub>O<sub>2</sub>S (M), 356.1307, found 356.1320.

### 1-Phenyl-5-[3-(tritylthio)propylsulfonyl]-1H-tetrazole (10).

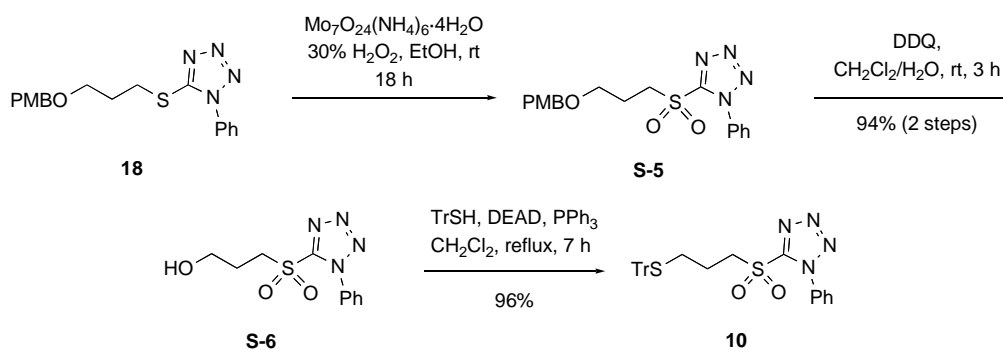

Hexaammonium heptamolybdate tetrahydrate [ $\text{Mo}_7\text{O}_{24}(\text{NH}_4)_6 \cdot 4\text{H}_2\text{O}$ ] (1.08 g, 0.9 mmol) in 30% aqueous  $\text{H}_2\text{O}_2$  (9.38 mL, 83 mmol) was added dropwise to a stirred solution of **18** (3.10 g, 8.7 mmol) in EtOH (90 mL) at 0°C, and the mixture was allowed to warm up to room temperature. After 18 h, the reaction was quenched with water (20 mL) at room temperature, and the resulting mixture was extracted with EtOAc (3 x 40 mL). The organic layer was washed with saturated aqueous  $\text{Na}_2\text{S}_2\text{O}_3$  (2 x 20 mL) and brine (2 x 20 mL), then dried over  $\text{MgSO}_4$ . Concentration of the solvent *in vacuo* afforded a residue, which was purified by short-pass column chromatography (hexane/EtOAc, 3:1) to give **S-5** (3.30 g), which was used for the next reaction without further purification.

2,3-Dichloro-5,6-dicyano-1,4-benzoquinone (DDQ) (3.51 g, 16 mmol) was added in small portions to a stirred solution of **S-5** (3.30 g, 7.8 mmol) in  $\text{CH}_2\text{Cl}_2/\text{H}_2\text{O}$  (9:1, 150 mL) at room temperature under argon. After 3 h, the mixture was diluted with  $\text{CH}_2\text{Cl}_2$  (50 mL), and the organic layer was washed with saturated aqueous  $\text{NaHCO}_3$  (2 x 40 mL) and brine (2 x 40 mL), then dried over  $\text{Na}_2\text{SO}_4$ . Concentration of the solvent *in vacuo* afforded a residue, which was purified by column chromatography (hexane/EtOAc, 2:1) to give **S-6** (655 mg, 94%, two steps) as a colorless oil.

Diethyl azodicarboxylate (DEAD) in toluene (2.2 M in solution, 0.68 mL, 1.5 mmol) was added dropwise to a stirred solution of **S-6** (200 mg, 0.75 mmol) in dry  $\text{CH}_2\text{Cl}_2$  (10 mL) containing  $\text{Ph}_3\text{P}$  (391 mg, 1.5 mmol) and triphenylmethyl thiol (412 mg, 1.5 mmol) at room temperature under argon. The mixture was heated at reflux for 7 h under argon. After cooling, the reaction mixture was concentrated *in vacuo* to afford a residue, which was purified by column chromatography (hexane/EtOAc, 6:1) to give **10** (377 mg, 96%) as a white solid. Recrystallization from hexane/AcOEt afforded white needles, mp 117–119 °C. IR (neat): 2360, 1593, 1339, 761, 744, 700  $\text{cm}^{-1}$ ;  $^1\text{H}$  NMR (400 MHz,  $\text{CDCl}_3$ ):  $\delta$  1.82–1.89 (2H, m), 2.39 (2H, t,  $J = 6.8$  Hz), 3.56 (2H, dd,  $J = 5.4, 10.2$  Hz), 7.18–7.65 (20H, m);  $^{13}\text{C}$  NMR (100 MHz,  $\text{CDCl}_3$ ):  $\delta$  21.5, 30.0, 54.9, 67.2, 77.2, 125.1, 126.9 (3 C), 128.0 (8 C), 129.5 (4 C), 129.7 (2 C), 131.4, 132.9, 144.4 (3 C), 153.3; HRMS ( $\text{FAB}^+$ ) calcd for  $\text{C}_{29}\text{H}_{27}\text{N}_4\text{O}_2\text{S}_2$  ( $\text{M}^+ + 1$ ), 527.1575, found 527.1578.

**(2*S*,4*S*)-2-(4-Methoxyphenyl)-4-[(*E/Z*)-4-(tritylthio)but-1-enyl]-1,3-dioxane (19).**

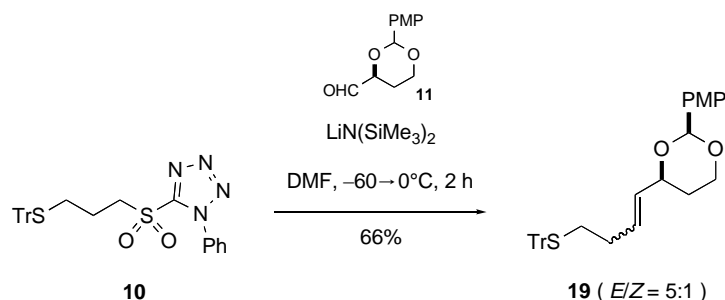

Lithium bis(trimethylsilyl)amide in THF (1.0 M solution, 8.9 mL, 8.9 mmol) was added dropwise to a stirred solution of **10** (4.26 g, 8.1 mmol) and (4*S*)-2-(4-methoxyphenyl)-1,3-dioxane-4-carbaldehyde (**11**) (2.68 g, 12 mmol) in dry DMF (200 mL) at  $-60^\circ\text{C}$  under argon. After 2 h, the mixture was gradually warmed up to  $0^\circ\text{C}$  over 2 h. The reaction was quenched with saturated aqueous  $\text{NH}_4\text{Cl}$  (20 mL) at  $0^\circ\text{C}$ . The resulting mixture was extracted with  $\text{Et}_2\text{O}$  (3 x 150 mL), and the combined extracts were washed with brine (2 x 100 mL), then dried over  $\text{Na}_2\text{SO}_4$ . Concentration of the solvent *in vacuo* afforded a residue, which was purified by column chromatography (hexane/ $\text{EtOAc}$ , 6:1) to give **19** (2.77 g, 66%) as an olefinic isomers (*E/Z* = 5:1) as a colorless oil. IR (neat) : 2955, 2849, 2025, 1954, 1615, 1372, 1302, 747, 702  $\text{cm}^{-1}$ ;  $^1\text{H}$  NMR (400 MHz,  $\text{CDCl}_3$ ):  $\delta$  1.51 (1H, t,  $J = 12.1$  Hz), 1.86 (1H, ddd,  $J = 5.3, 12.1, 24.4$  Hz), 2.09 (2H, t,  $J = 6.8$  Hz), 2.19 (2H, d,  $J = 6.8$  Hz), 3.78 (3H, s), 3.93 (1H, dt,  $J = 2.4, 12.1$  Hz), 4.21–4.26 (2H, m), 5.45–5.50 (1H, m), 5.61 (1H, t,  $J = 6.8$  Hz), 6.85 (1H, dd,  $J = 1.9, 4.8$  Hz), 7.17–7.44 (20H, m);  $^{13}\text{C}$  NMR (100 MHz,  $\text{CDCl}_3$ ):  $\delta$  31.3, 31.4, 55.3, 66.5, 66.9, 77.1, 77.2, 101.2, 113.5, 113.6, 126.5, 126.6, 127.4, 127.8, 128.0 (7 C), 129.6 (6 C), 130.3, 131.1, 131.2, 144.9 (3 C), 159.9; HRMS (FAB $^+$ ) calcd for  $\text{C}_{34}\text{H}_{35}\text{O}_3\text{S}$  ( $\text{M}^+ + 1$ ), 522.2229, found 523.2162.

**(*S,E*)-3-(4-Methoxybenzyloxy)-7-(tritylthio)hept-4-en-1-ol (20a) and its (*S,Z*)-isomer (20b).**

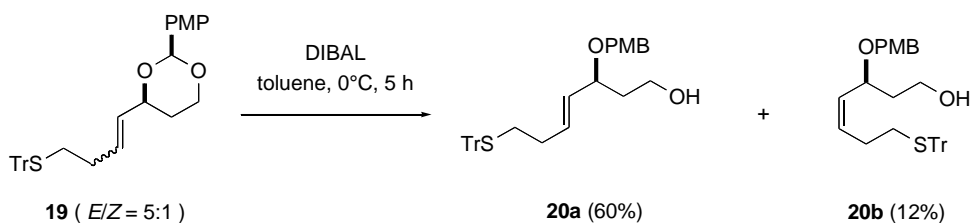

Diisobutylaluminum hydride (DIBAL) in toluene (1.0 M solution, 6.74 mL, 6.7 mmol) was added dropwise to a stirred solution of **19** (*E/Z* = 5:1) (1.53 g, 2.9 mmol) in dry toluene (40 mL) at  $0^\circ\text{C}$  under argon. After 5 h, the reaction mixture was quenched 10% aqueous  $\text{NaOH}$  (10 mL) at  $0^\circ\text{C}$ . The resulting mixture was extracted with  $\text{Et}_2\text{O}$  (3 x 60 mL), and the combined extracts were washed with brine (3 x 50 mL), then dried over  $\text{Na}_2\text{SO}_4$ . Concentration of the solvent

*in vacuo* afforded a residue, which was purified by column chromatography (hexane/EtOAc, 3:1) to give **20a** (921 mg, 60%, more polar) and **20b** (184 mg, 12%, less polar).

**20a**: colorless oil,  $[\alpha]_D^{25} -33.1$  (*c* 1.02, CHCl<sub>3</sub>); IR (neat) : 3418, 1666, 1612, 1034, 972, 767, 743, 700 cm<sup>-1</sup>; <sup>1</sup>H NMR (400 MHz, CDCl<sub>3</sub>): δ 1.66–1.74 (1H, m), 1.78–1.86 (1H, m), 2.14 (2H, t, *J* = 6.8 Hz), 2.22 (2H, d, *J* = 6.8 Hz), 3.66–3.76 (2H, m), 3.79 (3H, s), 3.89 (1H, dt, *J* = 4.4, 8.2 Hz), 4.23 (1H, d, *J* = 11.2 Hz), 4.51 (1H, d, *J* = 11.2 Hz), 5.33 (1H, dd, *J* = 8.2, 15.5 Hz), 5.53 (1H, dd, *J* = 6.8, 13.6 Hz), 6.84 (1H, dd, *J* = 1.9, 6.8 Hz), 7.18–7.43 (19H, m); <sup>13</sup>C NMR (100 MHz, CDCl<sub>3</sub>): δ 31.2, 31.6, 37.9, 55.3, 60.8, 66.5, 69.6, 77.2, 79.1, 113.8 (2 C), 126.6, 127.8 (8 C), 129.4 (3 C), 129.6 (4 C), 130.3, 131.5, 132.2, 144.9 (3 C), 159.1; HRMS (FAB<sup>+</sup>) calcd for C<sub>34</sub>H<sub>35</sub>O<sub>3</sub>S (M<sup>+</sup>-1), 523.2307, found 523.2298.

**20b**: colorless oil,  $[\alpha]_D^{25} -10.2$  (*c* 0.94, CHCl<sub>3</sub>); IR (neat) : 3397, 2865, 1716, 1612, 1443, 1034, 743, 700 cm<sup>-1</sup>; <sup>1</sup>H NMR (400 MHz, CDCl<sub>3</sub>): δ 1.57–1.64 (1H, m), 1.76–1.85 (1H, m), 2.04–2.25 (4H, m), 2.46 (1H, d, *J* = 4.4 Hz), 3.64–3.76 (2H, m), 3.78 (3H, s), 4.17 (1H, d, *J* = 11.2 Hz), 4.23 (1H, d, *J* = 4.4 Hz), 4.45 (1H, d, *J* = 11.2 Hz), 5.37 (1H, dd, *J* = 9.2, 10.6 Hz), 5.46–5.52 (1H, m), 6.84 (2H, dd, *J* = 1.9, 6.3 Hz), 7.15–7.46 (17H, m); <sup>13</sup>C NMR (100 MHz, CDCl<sub>3</sub>): δ 26.9, 31.8, 37.7, 55.2, 60.8, 66.6, 69.8, 73.6, 113.8 (2 C), 126.5, 126.6, 127.8 (8 C), 129.3 (2 C), 129.4 (2 C), 129.5, 129.6 (2 C), 130.4, 131.2, 131.6, 144.8 (3 C), 159.2; HRMS (FAB<sup>+</sup>) calcd for C<sub>34</sub>H<sub>35</sub>O<sub>3</sub>S (M<sup>+</sup>-1), 523.2307, found 523.2298.

**(*S,E*)-3-(4-Methoxybenzyloxy)-7-(tritylthio)hept-4-enoic acid (21).**

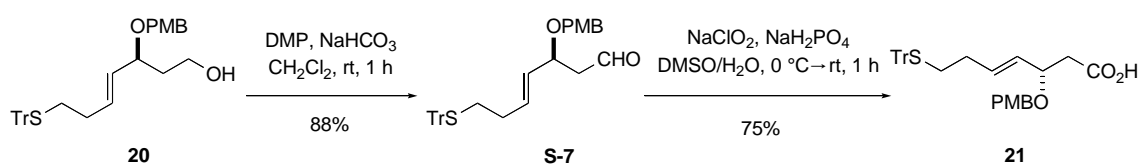

Dess-Martin periodinane (DMP) (1.07 g, 2.5 mmol) was added in small portions to a stirred solution of **20** (660 mg, 1.3 mmol) in CH<sub>2</sub>Cl<sub>2</sub> (60 mL) containing NaHCO<sub>3</sub> (1.06 g, 13 mmol) at room temperature. After 1 h, the reaction was quenched with saturated aqueous Na<sub>2</sub>S<sub>2</sub>O<sub>3</sub> (10 mL) at 0 °C, and the resulting mixture was extracted with CHCl<sub>3</sub> (3 x 50 mL). The combined extracts were washed with brine (2 x 30 mL), then dried over Na<sub>2</sub>SO<sub>4</sub>. Concentration of the solvent *in vacuo* afforded a residue, which was purified by column chromatography (hexane/EtOAc, 3:1) to give **S-7** (575 mg, 88%) as a colorless oil.

A solution of 80% NaClO<sub>2</sub> (635 mg, 5.6 mmol) and NaH<sub>2</sub>PO<sub>4</sub>·2H<sub>2</sub>O (876 mg, 5.6 mmol) in water (10 mL) were added dropwise to a stirred solution of **S-7** (575 mg, 1.1 mmol) in DMSO (40 mL) at 0 °C, and stirring was continued for 1 h at room temperature. The reaction was quenched with saturated aqueous Na<sub>2</sub>S<sub>2</sub>O<sub>3</sub> (20 mL) at 0 °C. The resulting mixture was extracted with Et<sub>2</sub>O (3 x 100 mL), and the combined extracts were washed with brine (2 x 50 mL), then dried over Na<sub>2</sub>SO<sub>4</sub>. Concentration of the solvent *in vacuo* afforded **21** (443 mg, 75%), which was used for the next reaction without further purification.  $[\alpha]_D^{25} -17.8$  (*c* 1.25, CHCl<sub>3</sub>); IR (neat) : 2835, 1738, 1713, 1668, 1644, 1594, 743, 700, 676 cm<sup>-1</sup>; <sup>1</sup>H NMR (400 MHz, CDCl<sub>3</sub>): δ 2.12–2.19 (2H, m), 2.21–2.25 (2H, m), 2.48 (1H, dd, *J* = 4.8, 15.5 Hz), 2.61 (1H, dd, *J* = 8.2, 15.5 Hz), 3.78 (3H, s), 4.12 (1H, dt, *J* = 4.8, 8.2 Hz), 4.29 (1H, d, *J* = 11.2 Hz), 4.52 (1H, d, *J* = 11.2 Hz), 5.31 (1H, dd, *J* = 8.2, 15.0 Hz), 5.56–5.63 (1H, m), 6.82 (2H, d, *J* = 8.8 Hz), 7.13–7.45 (19H, m); <sup>13</sup>C

NMR (100 MHz, CDCl<sub>3</sub>):  $\delta$  31.2, 31.4, 40.9, 55.2, 66.6, 69.8, 75.5, 77.2, 113.8 (x2), 126.6 (x3), 127.8, 127.9 (x8), 129.4, 129.5 (x3), 129.8, 129.9, 133.3, 144.9 (x3), 159.2, 175.9; HRMS (FAB<sup>+</sup>) calcd for C<sub>34</sub>H<sub>35</sub>O<sub>4</sub>S (M<sup>+</sup>), 539.2256, found 539.2273.

**(R)-Methyl 2-[(S,E)-3-(4-methoxybenzyloxy)-7-(tritylthio)hept-4-enamido]propanoate (22).**

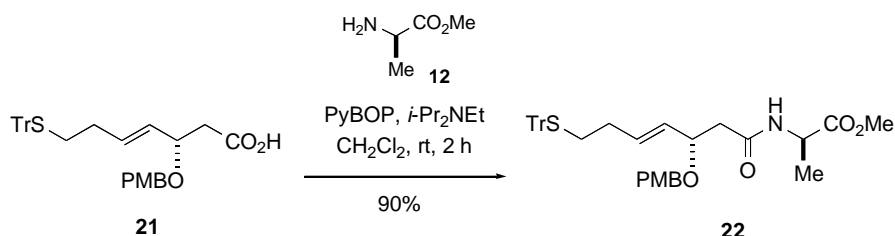

*N,N*-Diisopropylethylamine (1.12 mL, 6.6 mmol) was added dropwise to a stirred solution of **21** (507 mg, 0.9 mmol) in dry MeCN (20 mL) and D-alanine methyl ester (**12**) (261 mg, 1.9 mmol) containing (benzotriazol-1-yloxy)tripyrrolidinophosphonium hexafluorophosphate (PyBOP) (981 mg, 1.88 mmol) at room temperature under argon. After 2 h, the reaction mixture was diluted with EtOAc (100 mL). The organic layer was washed successively with 10% aqueous HCl (2 x 20 mL), saturated aqueous NaHCO<sub>3</sub> (2 x 20 mL) and brine (2 x 20 mL), then dried over Na<sub>2</sub>SO<sub>4</sub>. Concentration of the solvent *in vacuo* afforded a residue, which was purified by column chromatography (hexane/EtOAc, 1:1) to give **22** (528 mg, 90%) as a colorless oil. [ $\alpha$ ]<sub>D</sub><sup>25</sup> -7.9 (c 1.00, CHCl<sub>3</sub>); IR (neat) : 3318, 2867, 2836, 1745, 1659, 1513, 1247, 973, 744, 700 cm<sup>-1</sup>; <sup>1</sup>H NMR (400 MHz, CDCl<sub>3</sub>):  $\delta$  1.30 (3H, d, *J* = 7.3 Hz), 2.09–2.17 (2H, m), 2.22 (2H, t, *J* = 6.7 Hz), 2.35 (1H, dd, *J* = 3.8, 15.3 Hz), 2.48 (1H, dd, *J* = 8.6, 15.3 Hz), 3.72 (3H, s), 3.79 (3H, s), 4.08 (1H, dt, *J* = 3.3, 8.2 Hz), 4.30 (1H, d, *J* = 10.6 Hz), 4.49–4.59 (2H, m), 5.30 (1H, q, *J* = 7.7 Hz), 5.54–5.61 (1H, m), 6.82 (2H, d, *J* = 8.6 Hz), 6.89 (1H, d, *J* = 7.7 Hz), 7.19–7.42 (17H, m); <sup>13</sup>C NMR (100 MHz, CDCl<sub>3</sub>):  $\delta$  18.2, 31.2, 31.4, 42.7 (2 C), 47.8, 52.2, 55.2, 66.5, 69.9, 76.5, 77.2, 113.8 (2 C), 126.6 (3 C), 127.8 (8 C), 129.5, 129.6 (2 C), 129.7, 129.9, 130.3, 132.8, 144.8 (3 C), 159.2, 170.2, 173.3; HRMS (FAB<sup>+</sup>) calcd for C<sub>38</sub>H<sub>42</sub>NO<sub>5</sub>S (M<sup>+</sup>+1), 624.2783, found 624.2776.

**(R)-2-[(S,E)-3-(4-Methoxybenzyloxy)-7-(tritylthio)hept-4-enamido]propanoic acid (6).**

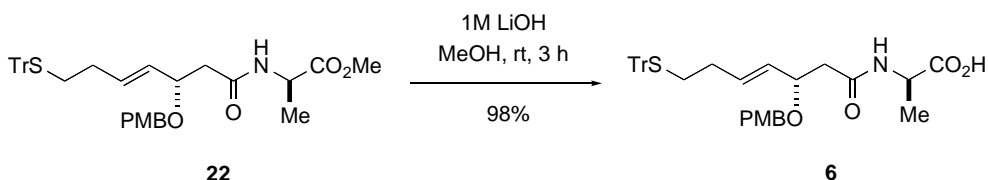

1 M LiOH (3.0 mL, 3.0 mmol) was added dropwise to a stirred solution of **22** (470 mg, 0.8 mmol) in MeOH (15 mL) at room temperature. After 3 h, 10% aqueous HCl was added to the mixture at 0°C until pH was 6. The resulting mixture was extracted with EtOAc (3 x 30 mL), and the combined extracts were washed with brine (2 x 30 mL), then dried over Na<sub>2</sub>SO<sub>4</sub>. Concentration of the solvent *in vacuo* afforded a residue, which was purified by column

chromatography (CHCl<sub>3</sub>/MeOH, 9:1) to give **6** (450 mg, 98%) as a white amorphous solid.  $[\alpha]_D^{25} -1.8$  (*c* 1.00, CHCl<sub>3</sub>); IR (neat) : 2931, 2868, 1730, 1632, 1614, 744, 700 cm<sup>-1</sup>; <sup>1</sup>H NMR (400 MHz, CDCl<sub>3</sub>): δ 1.32 (3H, d, *J* = 6.8 Hz), 2.10–2.15 (2H, m), 2.21 (2H, d, *J* = 6.8 Hz), 2.40 (1H, dd, *J* = 3.4, 15.6 Hz), 2.49 (1H, dd, *J* = 8.8, 15.6 Hz), 3.78 (3H, s), 4.08 (1H, dt, *J* = 3.4, 8.2 Hz), 4.25 (1H, d, *J* = 10.7 Hz), 4.44 (1H, t, *J* = 6.8 Hz), 4.49 (1H, d, *J* = 11.2 Hz), 5.29 (1H, dd, *J* = 8.2, 15.6 Hz), 5.59 (1H, dd, *J* = 6.8, 15.6 Hz), 6.82 (2H, d, *J* = 8.2 Hz), 7.00 (1H, d, *J* = 6.8 Hz), 7.17–7.42 (17H, m); <sup>13</sup>C NMR (100 MHz, CDCl<sub>3</sub>): δ 18.1, 31.5, 31.7, 42.6 (2 C), 48.5, 55.5, 66.9, 70.3, 77.5, 77.6, 114.1 (2 C), 126.9 (3 C), 128.1 (8 C), 129.8 (5 C), 130.0, 133.3, 145.1 (3 C), 159.5, 171.7, 176.4; HRMS (FAB<sup>+</sup>) calcd for C<sub>37</sub>H<sub>40</sub>NO<sub>5</sub>S (M<sup>+</sup>+1), 610.2627, found 610.2627.

**(3*S*,4*R*,5*R*)-3-(*tert*-Butyldimethylsilyloxy)-4-[(*S*)-2-[(*R*)-2-[(*S*,*E*)-3-hydroxy-7-(tritylthio)hept-4-enoylamino]propionylamino]-3-(tritylthio)propionylamino]-5-methylheptanoic acid (**4**)**

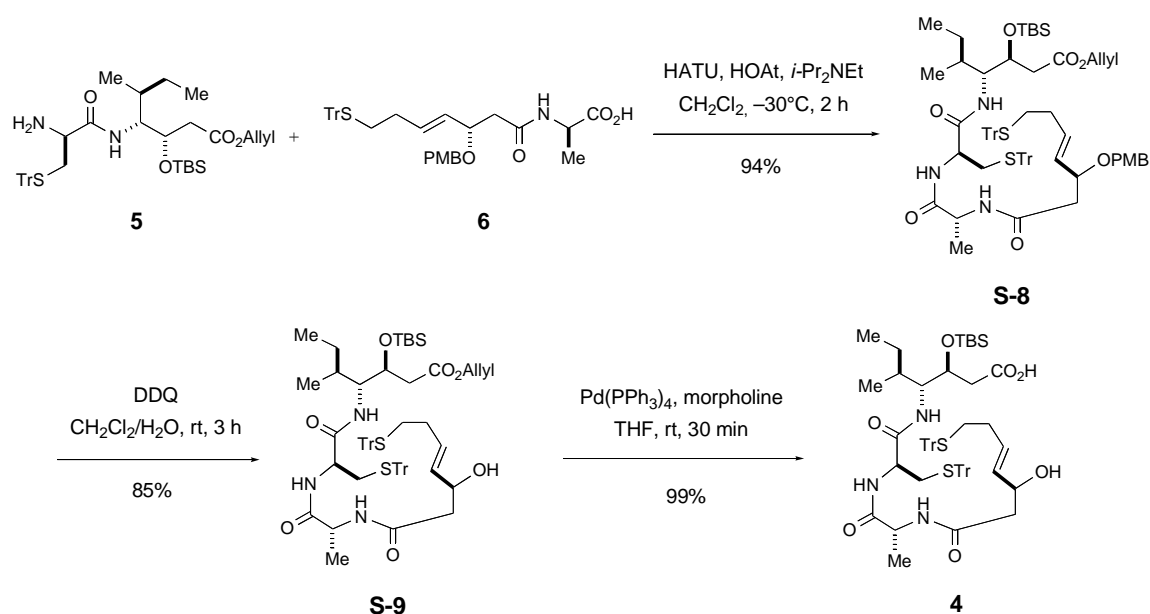

*N,N*-Diisopropylethylamine (0.30 mL, 1.8 mmol) was added dropwise to a stirred solution of **5** (465 mg, 0.7 mmol) and **6** (419 mg, 0.7 mmol) in dry CH<sub>2</sub>Cl<sub>2</sub> (14 mL) containing *O*-(7-azabenzotriazol-1-yl)-*N,N,N',N'*-tetramethyluronium hexafluorophosphate (HATU) (340 mg, 0.9 mmol) and 1-hydroxy-7-azabenzotriazol (HOAt) (122 mg, 0.9 mmol) at -30°C under argon. After 2 h, the reaction mixture was diluted with CHCl<sub>3</sub> (80 mL). The organic layer was washed successively with 10% aqueous HCl (2 x 20 mL), saturated aqueous NaHCO<sub>3</sub> (20 mL) and brine (20 mL), then dried over Na<sub>2</sub>SO<sub>4</sub>. Concentration of the solvent *in vacuo* afforded a residue, which was purified by column chromatography (hexane/EtOAc, 1:1) to give **S-8** (819 mg, 94%) as a colorless viscous liquid.

DDQ (276 mg, 1.2 mmol) was added in small portions to a stirred solution of **S-8** (769 mg, 0.61 mmol) in CH<sub>2</sub>Cl<sub>2</sub>/H<sub>2</sub>O 9:1 (12 mL) at room temperature under argon. After 3 h, the mixture was diluted with CHCl<sub>3</sub> (100 mL), and the organic layer was washed with saturated aqueous NaHCO<sub>3</sub> (2 x 25 mL) and brine (2 x 25 mL), then dried over Na<sub>2</sub>SO<sub>4</sub>. Concentration of the solvent *in vacuo* afforded a residue, which was purified by column chromatography (hexane/EtOAc, 3:2) to give **S-9** (592 mg, 85%) as a colorless viscous liquid.

Morpholine (69  $\mu$ L, 0.79 mmol) was added dropwise to a stirred solution of **S-9** (450 mg, 0.39 mmol) in dry THF (10 mL) containing Pd(PPh<sub>3</sub>)<sub>4</sub> (45.4 mg, 39  $\mu$ mol) at room temperature under argon. After 30 min, the reaction mixture diluted with EtOAc (100 mL), and the organic layer was washed successively with 10% aqueous HCl (2 x 25 mL), saturated aqueous NaHCO<sub>3</sub> (2 x 25 mL) and brine (2 x 25 mL), then dried over Na<sub>2</sub>SO<sub>4</sub>. Concentration of the solvent *in vacuo* afforded a residue, which was purified by column chromatography (CHCl<sub>3</sub>/MeOH, 9:1) to give **4** (430 mg, 99%) as a white amorphous solid.  $[\alpha]_D^{26}$  -3.9 (*c* 1.03, CHCl<sub>3</sub>); IR (neat) : 3284, 1712, 1635, 1595, 1095, 1033, 699 cm<sup>-1</sup>; <sup>1</sup>H NMR (400 MHz, CDCl<sub>3</sub>):  $\delta$  0.05 (6H, s), 0.80 (3H, d, *J* = 6.8 Hz), 0.85 (9H, s), 0.83–0.87 (3H, m), 1.07–1.16 (1H, m), 1.20–1.28 (4H, m), 1.31 (3H, d, *J* = 6.8 Hz), 1.79–1.83 (1H, m), 2.04 (2H, dd, *J* = 6.8, 14.1 Hz), 2.17–2.25 (3H, m), 2.32 (1H, dd, *J* = 2.9, 13.6 Hz), 2.38–2.46 (2H, m), 2.54 (1H, dd, *J* = 6.8, 16.5 Hz), 2.81 (1H, dd, *J* = 7.3, 12.6 Hz), 3.91–3.96 (1H, m), 4.05–4.17 (2H, m), 4.36–4.43 (2H, m), 5.32 (1H, dd, *J* = 5.9, 15.5 Hz), 5.42–5.48 (1H, m), 6.30 (1H, d, *J* = 10.2 Hz), 6.47 (1H, d, *J* = 7.3 Hz), 6.99 (1H, d, *J* = 7.8 Hz), 7.16–7.44 (30H, m); <sup>13</sup>C NMR (100 MHz, CDCl<sub>3</sub>):  $\delta$  -4.9, -4.3, 11.8, 13.3, 17.5, 17.9, 25.7, 27.2, 29.7, 31.3, 31.4, 33.0, 34.1, 40.2, 44.1 (4 C), 49.3, 53.1, 57.0, 66.6, 66.9, 68.8, 69.7, 77.2, 126.6 (3 C), 126.9 (3 C), 127.9 (6 C), 128.1 (8 C), 129.4 (6 C), 129.6 (3 C), 130.0, 132.2, 144.2 (3 C), 144.8, 170.3, 171.8, 172.7, 173.9; HRMS (FAB<sup>+</sup>) calcd for C<sub>65</sub>H<sub>79</sub>N<sub>3</sub>O<sub>7</sub>S<sub>2</sub>Si (M<sup>+</sup>+Na), 1128.5027, found 1128.5020.

**(2S,6R,9S,12R,13S)-13-(tert-Butyldimethylsiloxy)-12-[(S)-isobutyl]-6-methyl-2-[(E)-4-(tritylthio)but-1-enyl]-9-(tritylthio)methyl-1-oxa-5,8,11-triazacycloptadecane-4,7,10,15-tetraone (23).**

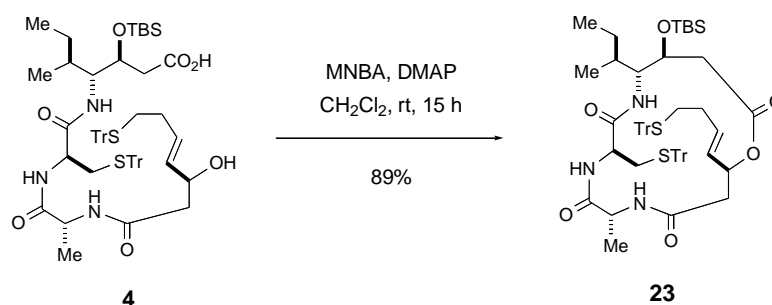

A solution of **4** (151 mg, 0.14 mmol) in dry CH<sub>2</sub>Cl<sub>2</sub> (10 mL) was added very slowly to a stirred solution of 2-methyl-6-nitrobenzoic anhydride (MNBA) (61.1 mg, 0.18 mmol) in dry CH<sub>2</sub>Cl<sub>2</sub> (120 mL, 1 mM concentration) containing *N,N*-dimethylamino pyridine (DMAP) (50.1 mg, 0.41 mmol) at room temperature over 14 hours. After 1 h, the mixture was diluted with CH<sub>2</sub>Cl<sub>2</sub> (30 mL), and the organic layer was washed with saturated aqueous NaHCO<sub>3</sub> (2 x 30 mL), water (2 x 30 mL), and brine (2 x 30 mL), then dried over Na<sub>2</sub>SO<sub>4</sub>. Concentration of the solvent *in vacuo* afforded a residue, which was purified by column chromatography (CHCl<sub>3</sub>/MeOH, 20:1) to give **23** (132 mg, 89%) as a white amorphous solid.  $[\alpha]_D^{25}$  -5.4 (*c* 1.00, CHCl<sub>3</sub>); IR (neat) : 1733, 1647, 1594, 1101, 1001, 751, 700, 666, 616 cm<sup>-1</sup>; <sup>1</sup>H NMR (400 MHz, CDCl<sub>3</sub>):  $\delta$  -0.06 (3H,s), 0.01 (3H,s), 0.76 (3H, d, *J* = 6.8 Hz), 0.82 (9H, s), 0.85–0.97 (3H, m), 1.00–1.11 (1H, m), 1.13–1.23 (1H, m), 1.34 (3H, d, *J* = 7.3 Hz), 1.79–1.87 (1H, m), 1.97–2.09 (2H, m), 2.16 (2H, t, *J* = 7.3 Hz), 2.31–2.45 (4H, m), 2.60 (1H, dd, *J* = 6.8, 15.0 Hz), 5.54–5.65 (2H, m), 6.46 (1H, br s), 6.86 (1H, br s), 7.04 (1H, d, *J* = 10.2 Hz), 7.14–7.48 (30H, m); <sup>13</sup>C NMR (100 MHz, CDCl<sub>3</sub>):  $\delta$  -4.9, -4.0, 12.0, 13.1, 16.5, 17.9, 25.7,

27.4, 31.0, 31.3, 32.0, 34.3, 41.9, 42.3 (4 C), 49.8, 56.7, 57.3, 66.6, 66.7, 68.4, 71.2, 77.2, 126.6 (3 C), 126.7 (2 C), 126.8, 127.9 (6 C), 128.2 (10 C), 129.5 (6 C), 129.8 (3 C), 132.9, 144.5 (3 C), 144.8, 169.9, 170.1, 170.2, 172.4; HRMS (FAB<sup>+</sup>) calcd for C<sub>65</sub>H<sub>77</sub>N<sub>3</sub>O<sub>6</sub>S<sub>2</sub>SiNa (M<sup>+</sup>+Na), 1110.4921, found 1110.4928.

### Spiruchostatin B (2).

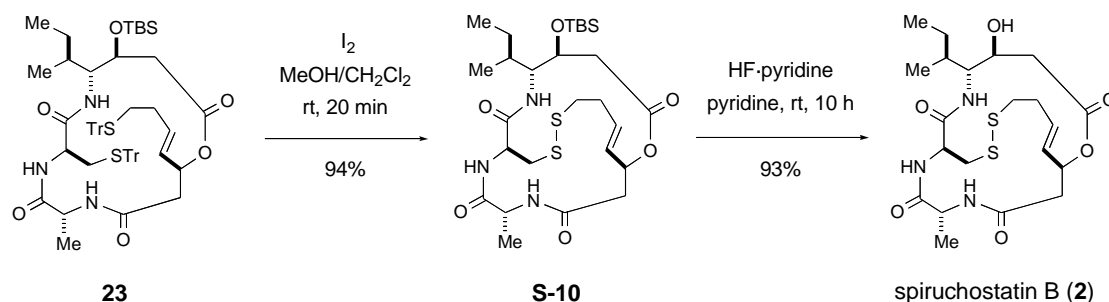

A solution of **23** (131 mg, 120  $\mu$ mol) in CH<sub>2</sub>Cl<sub>2</sub>/MeOH 9:1 (30 mL) was added dropwise to a vigorously stirring solution of I<sub>2</sub> (306 mg, 1.2 mmol) in CH<sub>2</sub>Cl<sub>2</sub>/MeOH 9:1 (170 mL, 0.5 mM concentration) over 10 min at room temperature. After 10 min, the reaction was quenched with 0.01M Na<sub>2</sub>S<sub>3</sub>O<sub>2</sub> (10 mL) at room temperature. The resulting mixture was diluted with CH<sub>2</sub>Cl<sub>2</sub> (50 mL), and the organic layer was washed with saturated aqueous NaHCO<sub>3</sub> (2 x 30 mL) and brine (2 x 30 mL), then dried over Na<sub>2</sub>SO<sub>4</sub>. Concentration of the solvent *in vacuo* afforded a residue, which was purified by column chromatography (CHCl<sub>3</sub>/MeOH, 20:1) to give **S-10** (68.3 mg, 94%) as a white amorphous solid.

HF-pyridine (1.0 mL) was added to a stirring solution of **S-10** (68.3 mg, 114  $\mu$ mol) in pyridine (2 mL) at room temperature. After 10 h, the reaction mixture was diluted with EtOAc (60 mL), and the organic layer was washed successively with 3% aqueous HCl (2 x 20 mL), saturated aqueous NaHCO<sub>3</sub> (2 x 20 mL) and brine (2 x 20 mL), then dried over Na<sub>2</sub>SO<sub>4</sub>. Concentration of the solvent *in vacuo* afforded a residue, which was purified by column chromatography (CHCl<sub>3</sub>/MeOH, 10:1) to give **2** (spiruchostatin B) (51.3 mg, 93%) as a white amorphous solid.  $[\alpha]_D^{25}$  -58.6 (*c* 0.11, MeOH); IR (neat) : 3374, 3332, 1731, 1660, 1539, 1273, 990 cm<sup>-1</sup>; <sup>1</sup>H NMR (400 MHz, CDCl<sub>3</sub>):  $\delta$  0.89 (3H, t, *J* = 7.5 Hz), 0.90 (3H, d, *J* = 7.0 Hz), 1.18–1.29 (2H, m), 1.50 (3H, d, *J* = 7.3 Hz), 1.54–1.59 (1H, m), 2.04–2.11 (1H, m), 2.42–2.51 (1H, m), 2.61 (1H, d, *J* = 13.2 Hz), 2.69–2.78 (4H, m), 2.93 (1H, m), 2.94 (1H, ddd, *J* = 4.0, 7.0, 9.0 Hz), 3.11–3.24 (2H, m), 3.33 (2H, dd, *J* = 7.3, 13.1 Hz), 4.22 (1H, dq, *J* = 3.9, 7.3 Hz), 4.60–4.65 (1H, m), 4.87 (1H, dt, *J* = 3.4, 9.2 Hz), 5.50–5.51 (1H, m), 5.68 (1H, d, *J* = 15.6 Hz), 6.27 (1H, s), 6.37–6.42 (1H, m), 6.78 (1H, d, *J* = 9.7 Hz), 7.29 (1H, d, *J* = 9.3 Hz); <sup>13</sup>C NMR (100 MHz, CDCl<sub>3</sub>):  $\delta$  11.5, 15.4, 16.6, 27.1, 33.3, 36.3, 39.5, 40.5, 40.7, 41.3, 52.2, 54.5, 61.7, 68.2, 70.6, 128.6, 133.4, 169.2, 170.6, 171.2, 171.8; HRMS (FAB<sup>+</sup>) calcd for C<sub>21</sub>H<sub>34</sub>N<sub>3</sub>O<sub>6</sub>S<sub>2</sub> (M<sup>+</sup>+1), 488.1889, found 488.1886. The IR, <sup>1</sup>H and <sup>13</sup>C NMR, and HRMS spectrum are essentially identical with those reported for natural spiruchostatin B.

### 5''-*epi*-Spiruchostatin B (5''-*epi*-2)

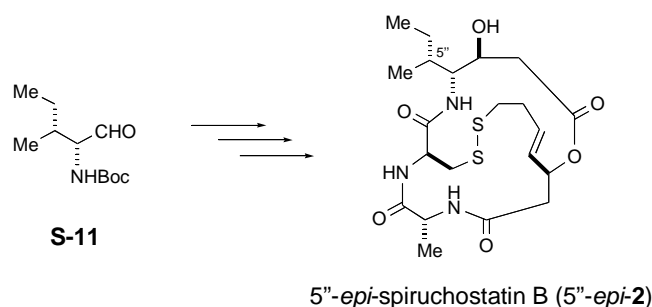

5''-*epi*-Spiruchostatin B (5''-*epi*-2) was synthesized in the same manner as described for the synthetic pathway to spiruchostatin B (**2**) by employing (2*R*,3*R*)-*N*-(*tert*-butoxycarbonyl)-D-isoleucinal (**S-11**) instead of (2*R*,3*S*)-*N*-(*tert*-butoxycarbonyl)-D-allo-isoleucinal (**7**).  $[\alpha]_D^{25} -51.9$  (*c* 0.10, MeOH); IR (KBr) : 3375, 3320, 2964, 1731, 1660, 1652, 1539, 1040, 891, 753  $\text{cm}^{-1}$ ;  $^1\text{H}$  NMR (400 MHz,  $\text{CDCl}_3$ ):  $\delta$  0.82 (3H, t,  $J = 7.3$  Hz), 0.97 (3H, d,  $J = 6.8$  Hz), 1.02–1.11 (1H, m), 1.46 (3H, d,  $J = 7.3$  Hz), 1.50–1.56 (1H, m), 2.07 (1H, q,  $J = 7.3$  Hz), 2.41–2.49 (1H, m), 2.68 (1H, d,  $J = 12.6$  Hz), 2.64–2.78 (4H, m), 2.95 (1H, q,  $J = 7.8$  Hz), 3.24 (2H, dd,  $J = 6.8, 13.2$  Hz), 4.13–4.19 (1H, m), 4.45–4.47 (1H, m), 4.72 (1H, dd,  $J = 8.3, 13.2$  Hz), 5.50 (1H, br s), 5.75 (1H, d,  $J = 15.6$  Hz), 6.16–6.18 (1H, m), 6.98 (1H, d,  $J = 8.7$  Hz), 7.07 (1H, s), 7.42 (1H, d,  $J = 7.3$  Hz);  $^{13}\text{C}$  NMR (100 MHz,  $\text{CDCl}_3$ ):  $\delta$  10.8, 16.3, 16.4, 25.8, 32.6, 35.8, 39.5, 39.7, 39.9, 40.9, 52.2, 55.8, 61.7, 69.1, 71.0, 129.5, 132.8, 169.2, 171.1, 171.4, 171.9; HRMS (FAB<sup>+</sup>) calcd for  $\text{C}_{21}\text{H}_{34}\text{N}_3\text{O}_6\text{S}_2$  ( $M^+ + 1$ ), 488.1889, found 488.1886. The  $^1\text{H}$  and  $^{13}\text{C}$  NMR spectrum did not match those reported for natural spiruchostatin B.



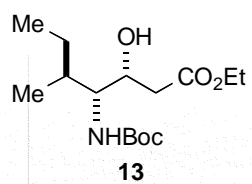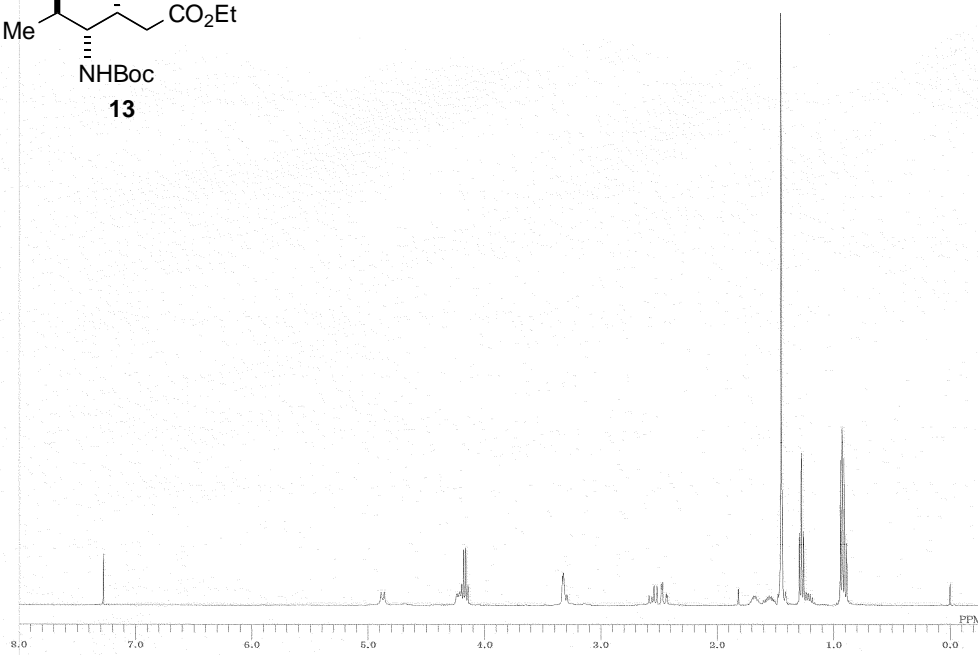

DFILE KK-6047-aldol-逆.als  
COMNT KK-6047-aldol-逆  
DATIM Mon Oct 29 17:06:58 2  
IH  
NO  
OBFRQ 399.65 MHz  
OBSET 124.00 KHz  
OBFIN 10500.00 Hz  
POINT 18394  
FREQU 7992.01 Hz  
SCANS 16  
ACQTM 2.0501 sec  
PD 4.9500 sec  
PWI 5.40 usec  
IRNUC IH  
CTEMP 26.5 c  
SIVNT CDCL3  
EXREF 0.00 ppm  
BF 0.24 Hz  
RGAIN 9

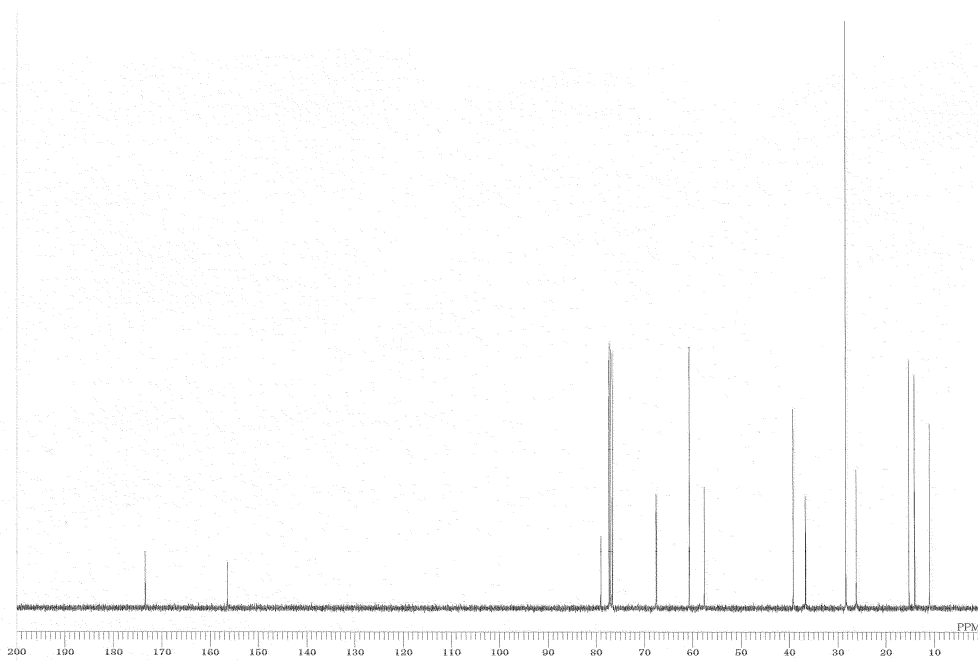

DFILE KK-6047-aldol-逆-13C  
COMNT KK-6047-aldol-逆-13C  
DATIM Mon Oct 29 17:51:54 2  
13C  
BCM  
OBFRQ 100.40 MHz  
OBSET 125.00 KHz  
OBFIN 10500.00 Hz  
POINT 32768  
FREQU 27116.64 Hz  
SCANS 880  
ACQTM 1.2083 sec  
PD 1.7920 sec  
PWI 5.60 usec  
IRNUC IH  
CTEMP 29.1 c  
SIVNT CDCL3  
EXREF 77.00 ppm  
BF 0.24 Hz  
RGAIN 24

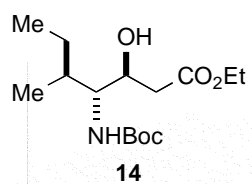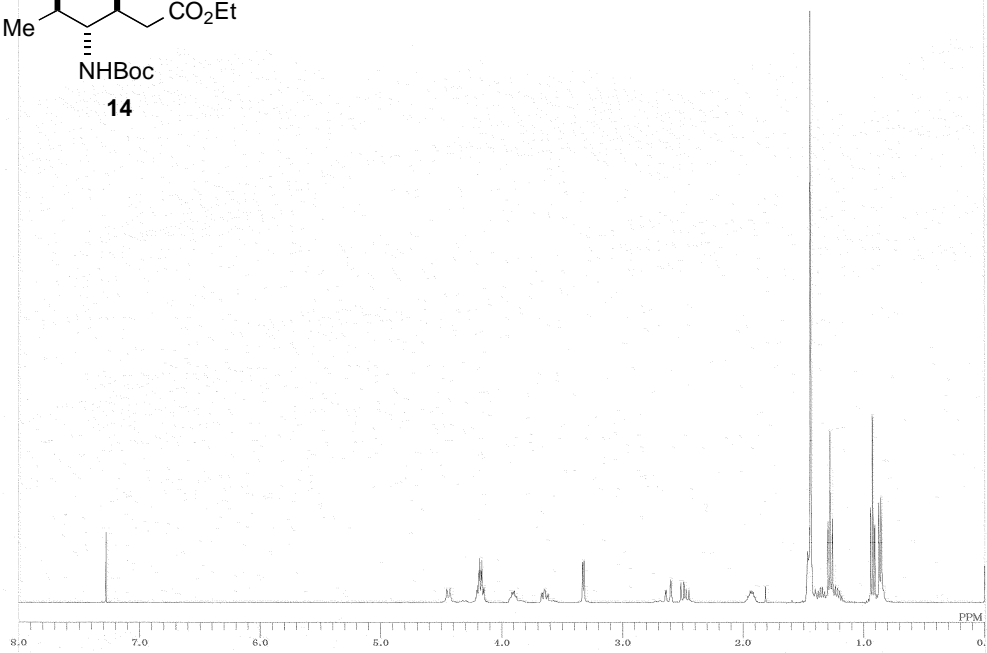

DFILE KK-6041-15-18-下の  
COMNT KK-6041-15-18-下の  
DATM Wed Oct 24 12:16:56  
IH  
OBNUC  
EXMOD NON  
OBFRQ 399.65 MHz  
OBSET 124.00 KHz  
OBFIN 10500.00 Hz  
POINT 16384  
FREQU 7992.01 Hz  
SCANS 16  
ACQTM 2.0501 sec  
PD 4.9500 sec  
PWI 5.40 usec  
IRNUC IH  
CTEMP 23.0 c  
SLVNT CDCL3  
EXREF 0.00 ppm  
BF 0.24 Hz  
RGAIN 10

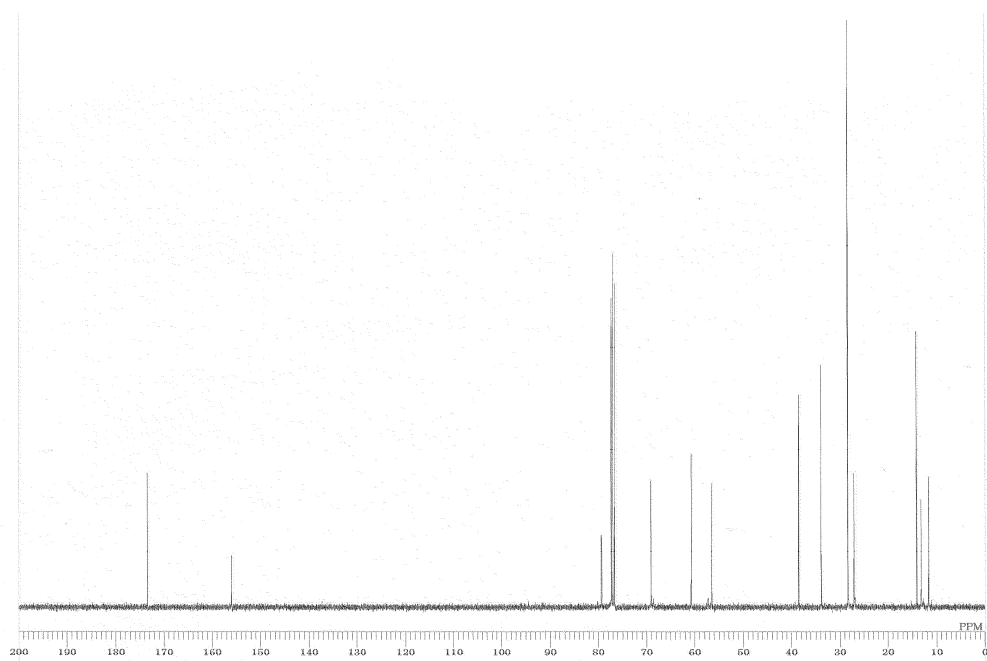

DFILE KK-6041-15-18-下の  
COMNT KK-6041-15-18-下の  
DATM Wed Oct 24 13:51:49  
13C  
OBNUC BCM  
EXMOD BCM  
OBFRQ 100.40 MHz  
OBSET 125.00 KHz  
OBFIN 10500.00 Hz  
POINT 32768  
FREQU 27118.64 Hz  
SCANS 1120  
ACQTM 1.2083 sec  
PD 1.7920 sec  
PWI 5.60 usec  
IRNUC IH  
CTEMP 25.7 c  
SLVNT CDCL3  
EXREF 77.00 ppm  
BF 0.24 Hz  
RGAIN 25

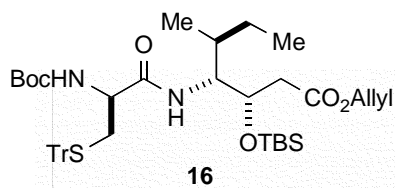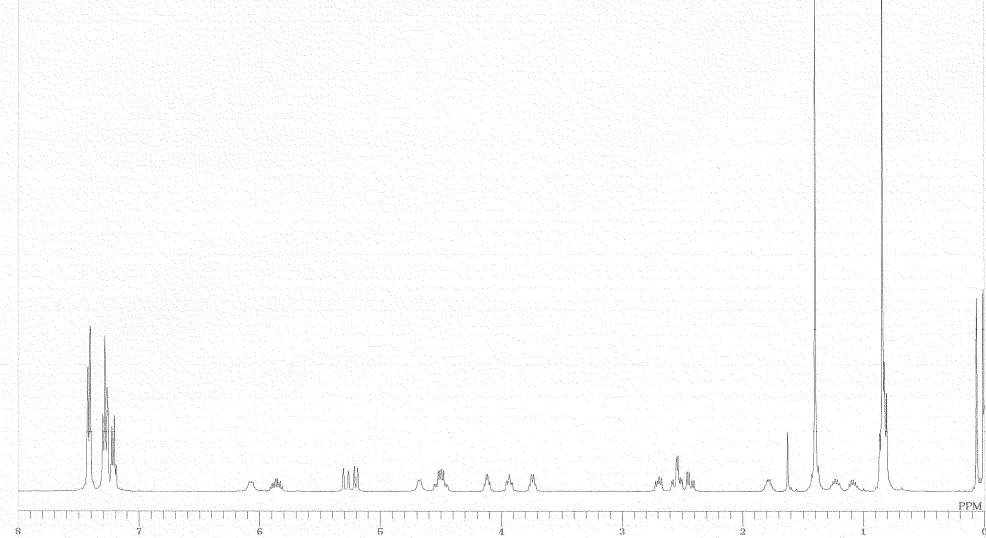

DFILE KK-6063-再.als  
COMNT KK-6063-再  
DATM Tue Nov 06 19:43:59 2  
IH  
EXMOD NOVA  
OBFREQ 399.65 MHz  
OBSET 124.00 KHz  
OBFIN 10500.00 Hz  
POINT 16354  
FREQU 7992.01 Hz  
SCANS 16  
ACQTM 2.1501 sec  
PD 4.9500 sec  
PWI 5.40 usec  
IRNUC IH  
CTEMP 22.1 c  
SLVNT CDCL3  
EXREF 0.00 ppm  
BF 1.40 Hz  
RGAIN 12

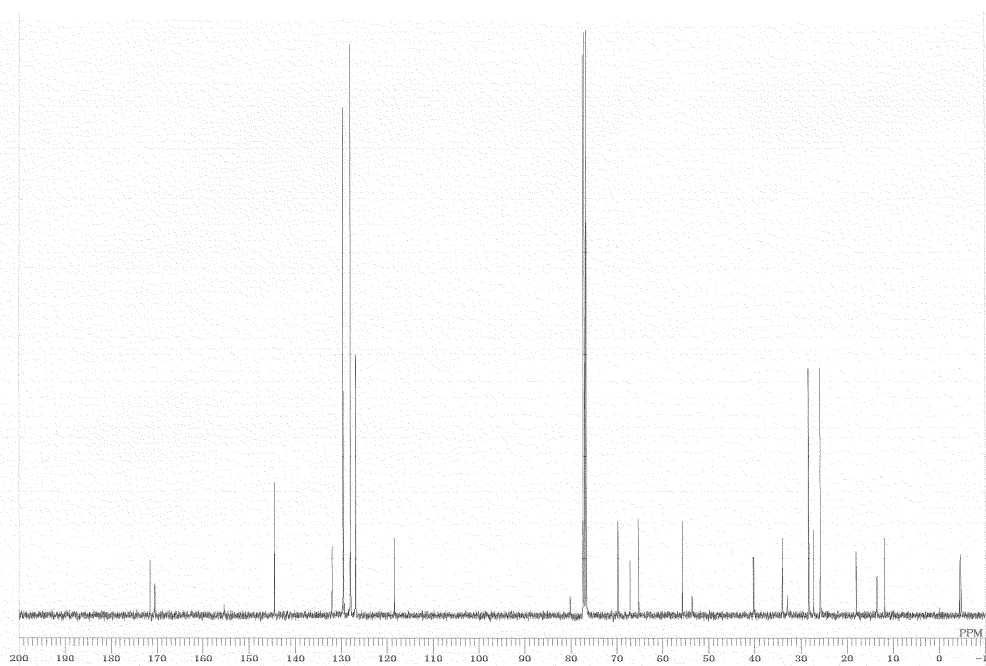

DFILE KK-6063-再-13C.als  
COMNT KK-6063-再-13C  
DATM Tue Nov 06 20:39:58 2  
IH  
EXMOD BCM  
OBFREQ 100.40 MHz  
OBSET 125.00 KHz  
OBFIN 10500.00 Hz  
POINT 32768  
FREQU 27118.64 Hz  
SCANS 1100  
ACQTM 1.2083 sec  
PD 1.7920 sec  
PWI 5.60 usec  
IRNUC IH  
CTEMP 24.4 c  
SLVNT CDCL3  
EXREF 77.00 ppm  
BF 1.40 Hz  
RGAIN 25

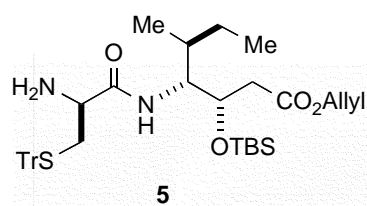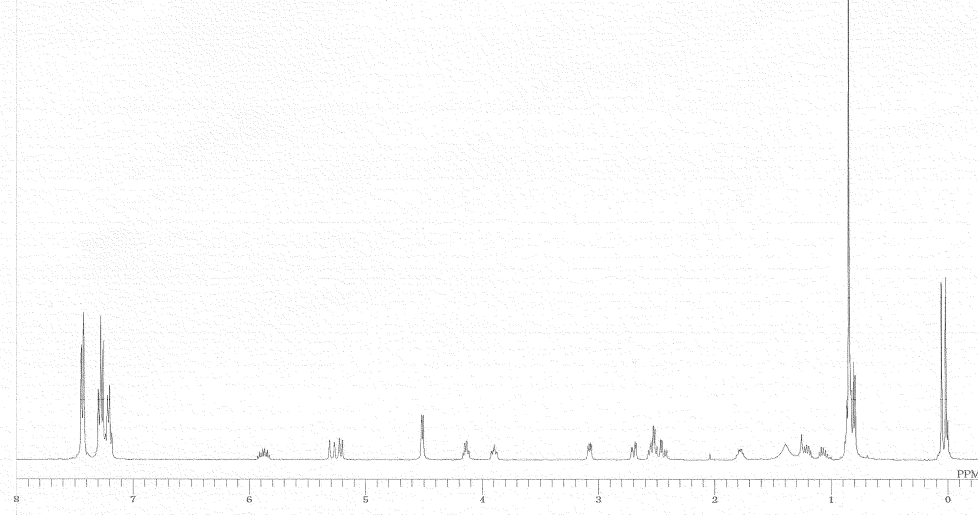

DFILE N-625B amine segment  
COMNT N-625B  
DATIM Sat Nov 03 17:49:03 2008  
OBNUC 1H  
EXMOD NOX  
OBFRQ 399.65 MHz  
OBSET 124.00 KHz  
OBFIN 10500.00 Hz  
POINT 16384  
FREQU 7992.01 Hz  
SCANS 8  
ACQTM 2.0501 sec  
PD 4.9500 sec  
PWI 5.40 usec  
IRNUC 1H  
CTEMP 24.3 c  
SLVNT CDCL3  
EXREF 0.00 ppm  
BF 1.40 Hz  
RGAIN 13

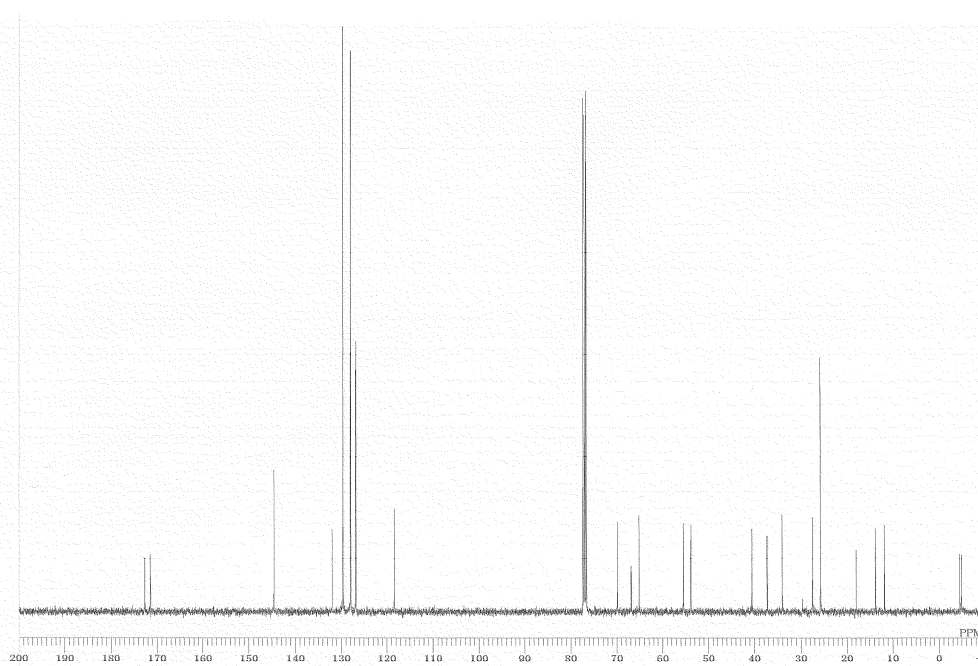

DFILE N-625B C-13 amine segment  
COMNT N-625B C-13  
DATIM Sat Nov 03 19:06:50 2008  
OBNUC 13C  
EXMOD BCM  
OBFRQ 100.40 MHz  
OBSET 125.00 KHz  
OBFIN 10500.00 Hz  
POINT 32768  
FREQU 27118.64 Hz  
SCANS 1024  
ACQTM 1.2083 sec  
PD 1.7920 sec  
PWI 5.60 usec  
IRNUC 1H  
CTEMP 26.6 c  
SLVNT CDCL3  
EXREF 77.00 ppm  
BF 1.40 Hz  
RGAIN 24

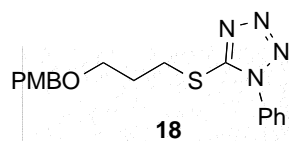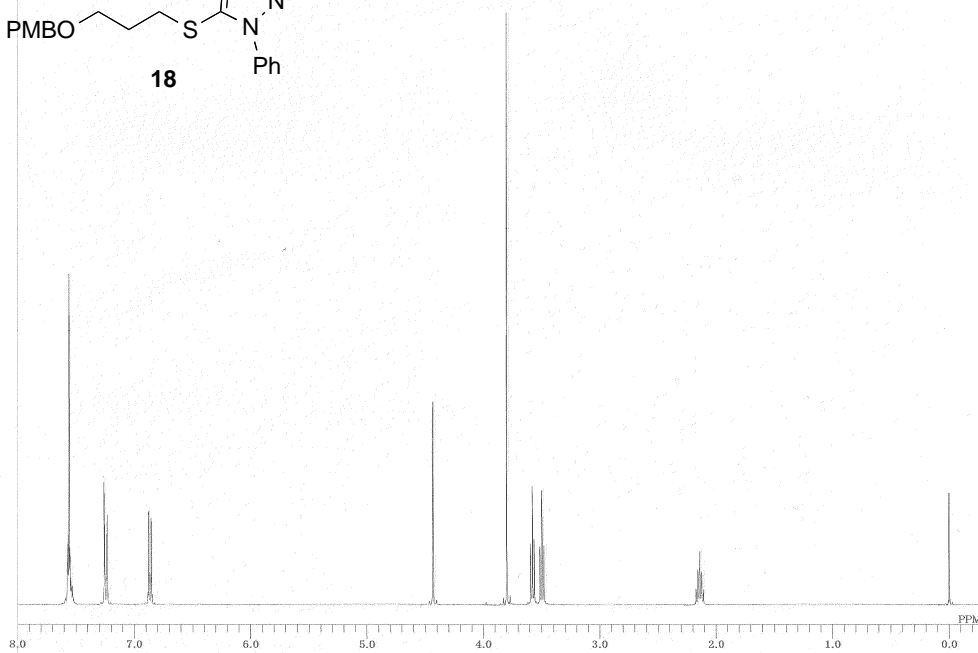

DFILE N-FK-2.als  
COMNT N-FK-2  
DATIM Sat Apr 14 22:32:37 20  
OBNUC 1H  
EXMOD NONE  
OBFRQ 399.65 MHz  
OBSET 124.00 KHz  
OBFIN 10500.00 Hz  
POINT 16384  
FREQU 7992.01 Hz  
SCANS 16  
ACQTM 2.0501 sec  
PD 4.9500 sec  
PWL 5.40 usec  
IRNUC 1H  
CTEMP 23.6 c  
SLVNT CDCL3  
EXREF 0.00 ppm  
BF 0.24 Hz  
RGAIN 17

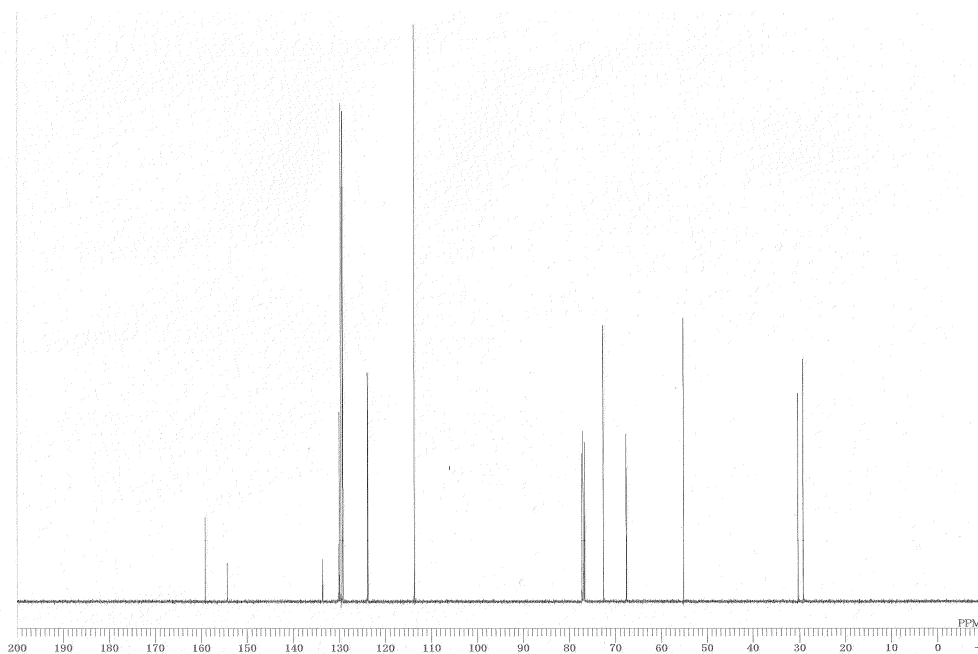

DFILE N-FK-2 C-13.als  
COMNT N-FK-2 C-13  
DATIM Sat Apr 14 23:54:42 20  
OBNUC 13C  
EXMOD BGM  
OBFRQ 100.40 MHz  
OBSET 125.00 KHz  
OBFIN 10500.00 Hz  
POINT 32768  
FREQU 27118.64 Hz  
SCANS 325  
ACQTM 1.2083 sec  
PD 1.7920 sec  
PWL 5.60 usec  
IRNUC 1H  
CTEMP 25.9 c  
SLVNT CDCL3  
EXREF 77.00 ppm  
BF 0.24 Hz  
RGAIN 25

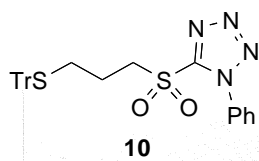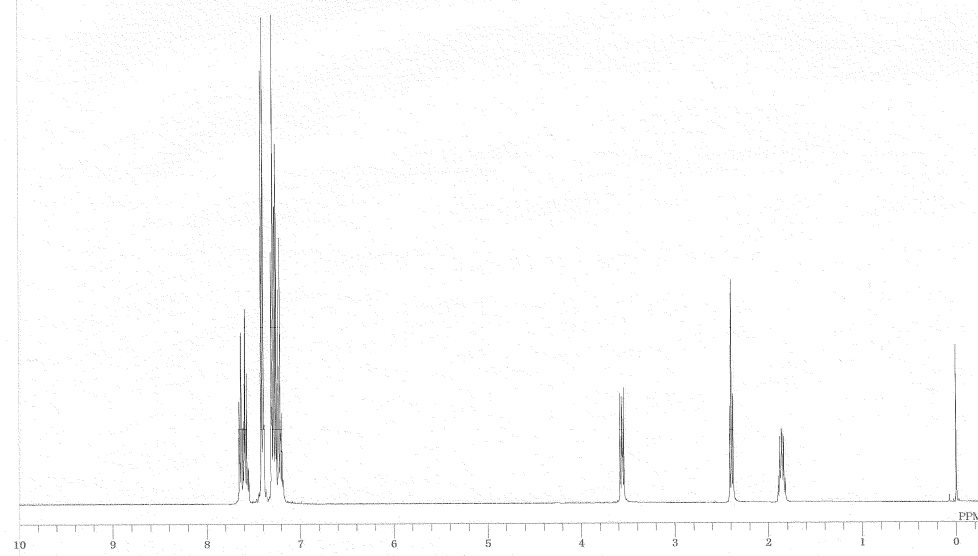

DFILE N-464RE.als  
COMNT N-464RE  
DATIM Wed Apr 11 17:18:07 2  
ORNUC 1H  
EXMOD NON  
OBFRQ 399.65 MHz  
OBSET 124.00 KHz  
OBFIN 10500.00 Hz  
POINT 16384  
FREQU 7992.01 Hz  
SCANS 16  
ACQTM 2.0501 sec  
PD 4.9500 sec  
PWL 5.40 usec  
IRNUC 1H  
CTEMP 23.3 c  
SOLVT CDCL3  
EXREF 0.00 ppm  
BF 0.24 Hz  
RGAIN 14

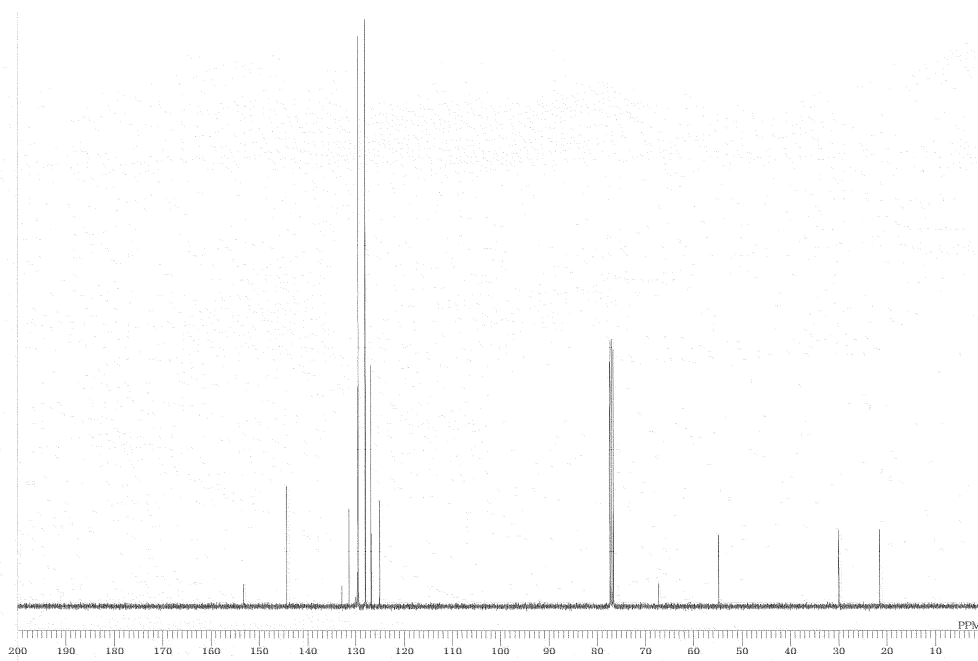

DFILE N-464RE C-13.als  
COMNT N-464RE  
DATIM Wed Apr 11 18:07:23 2  
ORNUC 13C  
EXMOD ECM  
OBFRQ 100.40 MHz  
OBSET 125.00 KHz  
OBFIN 10500.00 Hz  
POINT 32768  
FREQU 27118.64 Hz  
SCANS 306  
ACQTM 1.2083 sec  
PD 1.7920 sec  
PWL 5.60 usec  
IRNUC 1H  
CTEMP 25.4 c  
SOLVT CDCL3  
EXREF 77.00 ppm  
BF 0.24 Hz  
RGAIN 25

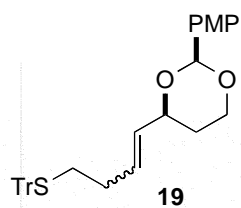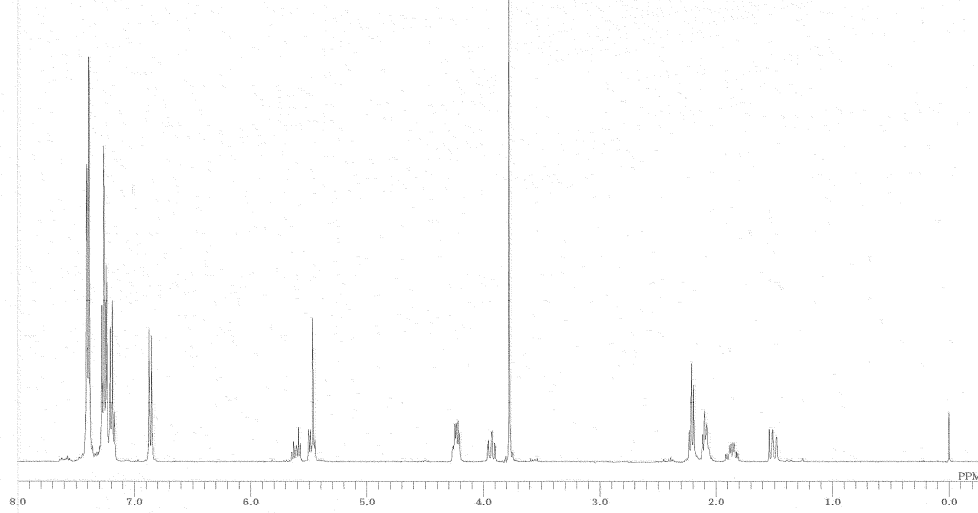

DFILE N-615B FK-epi-9.als  
COMNT N-615B  
DATIM Thu Oct 25 19:52:39 2  
1H  
NON  
OBFRQ 399.65 MHz  
OBSET 124.00 KHz  
OBFIN 10500.00 Hz  
POINT 16384  
FREQU 7992.01 Hz  
SCANS 8  
ACQTM 2.0501 sec  
PD 4.9500 sec  
PWL 5.40 usec  
IRNUC 1H  
CTEMP 22.6 c  
SLVNT CDCL3  
EXREF 0.00 ppm  
BF 0.24 Hz  
RGAIN 10

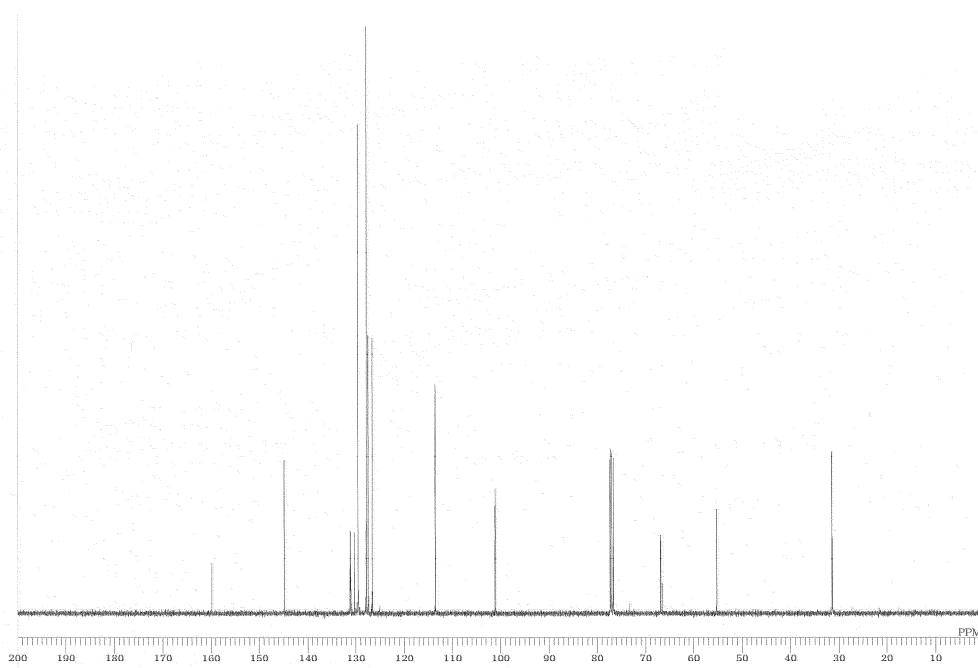

DFILE N-615B C-13 N-FK-epi-9.als  
COMNT N-615B  
DATIM Thu Oct 25 20:14:53 2  
13C  
BCM  
OBFRQ 100.40 MHz  
OBSET 125.00 KHz  
OBFIN 10500.00 Hz  
POINT 32768  
FREQU 27118.64 Hz  
SCANS 407  
ACQTM 1.2083 sec  
PD 1.7920 sec  
PWL 5.60 usec  
IRNUC 1H  
CTEMP 24.6 c  
SLVNT CDCL3  
EXREF 77.00 ppm  
BF 0.24 Hz  
RGAIN 25

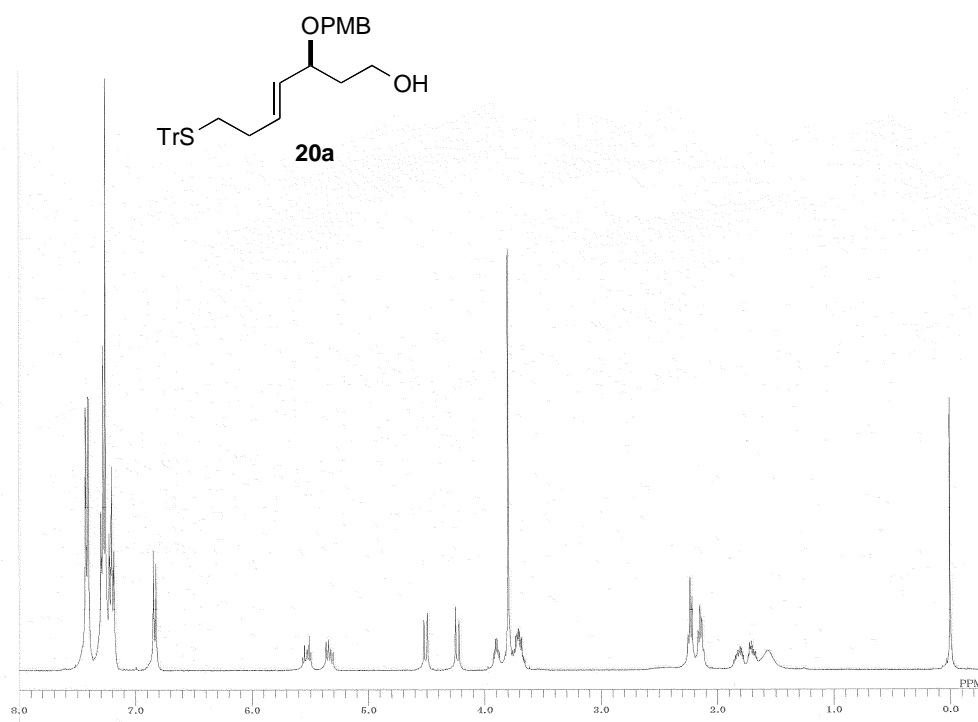

DFILE N-FK-epi-10.als  
COMNT N-FK-epi-10  
DATIM Thu May 24 12:25:21 2  
OBNUC 1H  
EXMOD NON  
OBFRQ 399.65 MHz  
OBSET 124.00 KHz  
OBFIN 10500.00 Hz  
POINT 15394  
FREQU 7992.01 Hz  
SCANS 16  
ACQTM 2.9591 sec  
PD 4.9500 sec  
PWL 5.40 usec  
IRNUC 1H  
CTEMP 24.3 c  
SLVNT CDCL3  
EXREF 0.00 ppm  
BF 0.24 Hz  
RGAIN 18

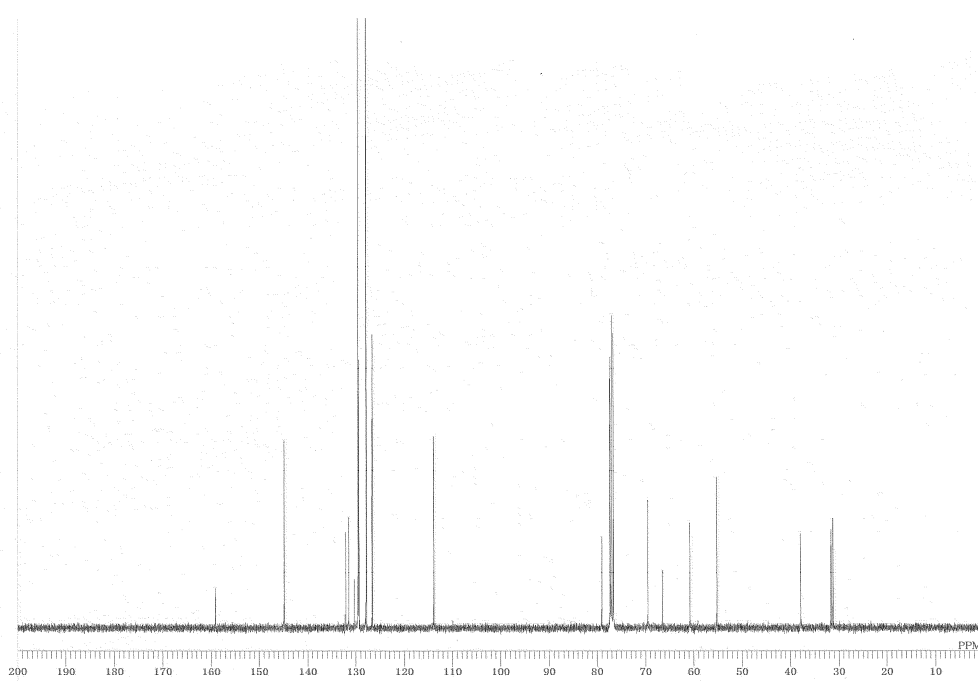

DFILE N-FK-epi-10 C-13.als  
COMNT N-FK-epi-10 C-13  
DATIM Wed May 23 23:18:17 :  
OBNUC 13C  
EXMOD BCM  
OBFRQ 100.40 MHz  
OBSET 125.00 KHz  
OBFIN 10500.00 Hz  
POINT 32768  
FREQU 27118.64 Hz  
SCANS 1024  
ACQTM 1.2083 sec  
PD 1.7920 sec  
PWL 5.60 usec  
IRNUC 1H  
CTEMP 25.4 c  
SLVNT CDCL3  
EXREF 77.00 ppm  
BF 0.24 Hz  
RGAIN 25



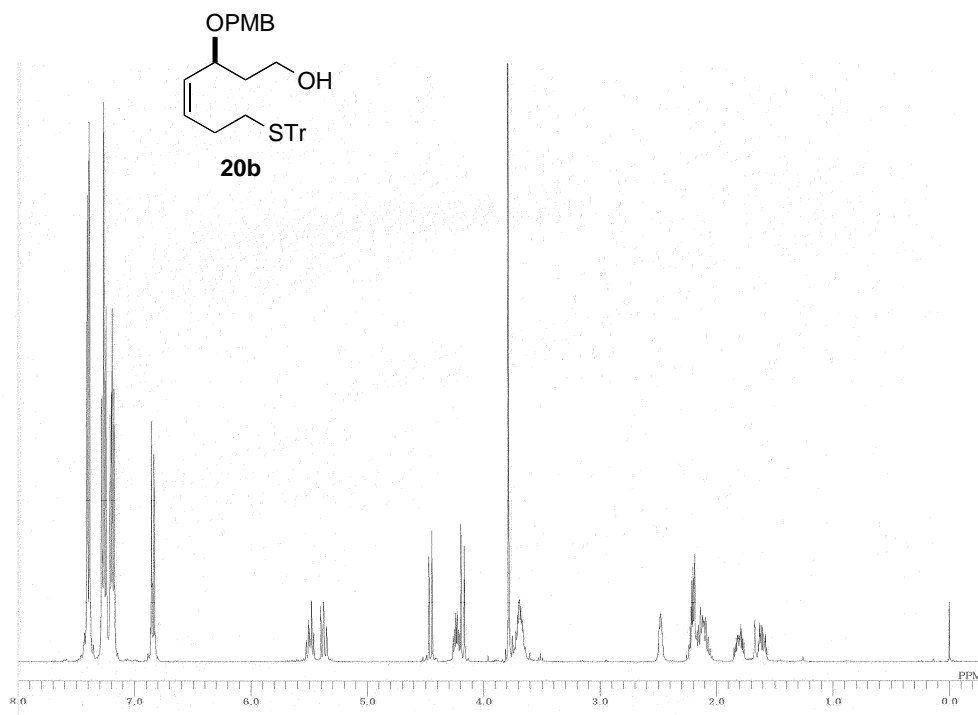

```
D1FILE DIBAL-Z-isomer.als
COMNT DIBAL-Z-isomer
DATIM Mon Oct 22 20:25:23 2
OBNUC 1H
EXMOD NON
OBFREQ 399.65 MHz
OBSET 124.00 KHz
OBFIN 10500.00 Hz
POINT 16384
FREQU 7992.01 Hz
SCANS 3
ACQTM 2.0501 sec
PD 4.9500 sec
PWL 5.40 usec
IRNUC 1H
CTEMP 23.0 c
SLVNT CDCL3
EXREF 0.00 ppm
BF 0.24 Hz
RGAIN 11
```

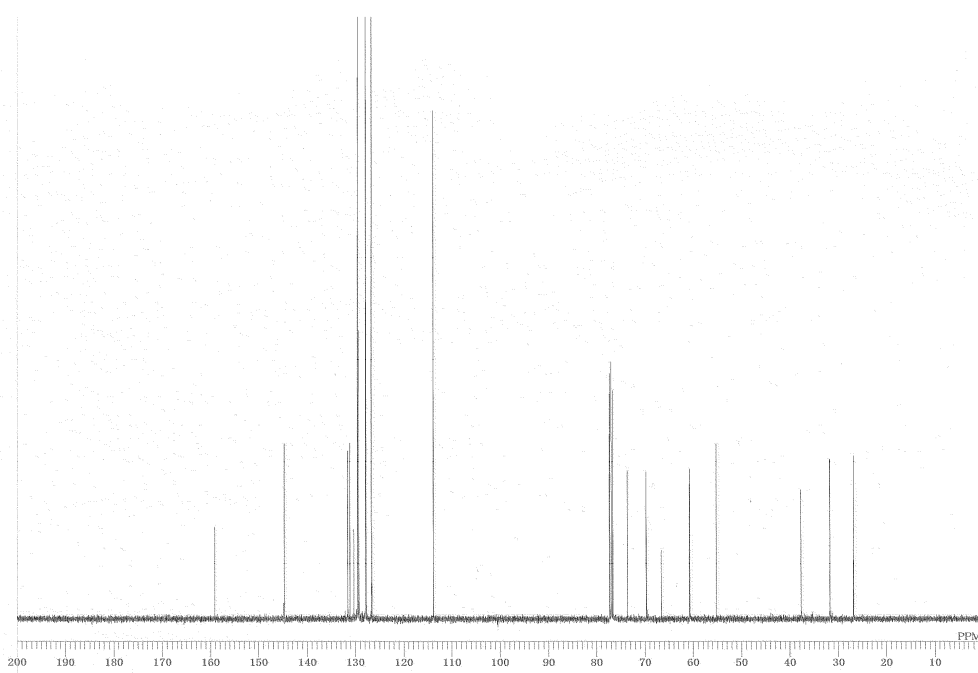

```
D1FILE DIBAL-Z-isomer C-13
COMNT DIBAL-Z-isomer C-13
DATIM Mon Oct 22 20:56:39 2
OBNUC 13C
EXMOD BCM
OBFREQ 100.40 MHz
OBSET 125.00 KHz
OBFIN 10500.00 Hz
POINT 32768
FREQU 27118.64 Hz
SCANS 602
ACQTM 1.2083 sec
PD 1.7920 sec
PWL 5.60 usec
IRNUC 1H
CTEMP 25.1 c
SLVNT CDCL3
EXREF 77.00 ppm
BF 0.24 Hz
RGAIN 23
```

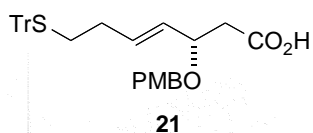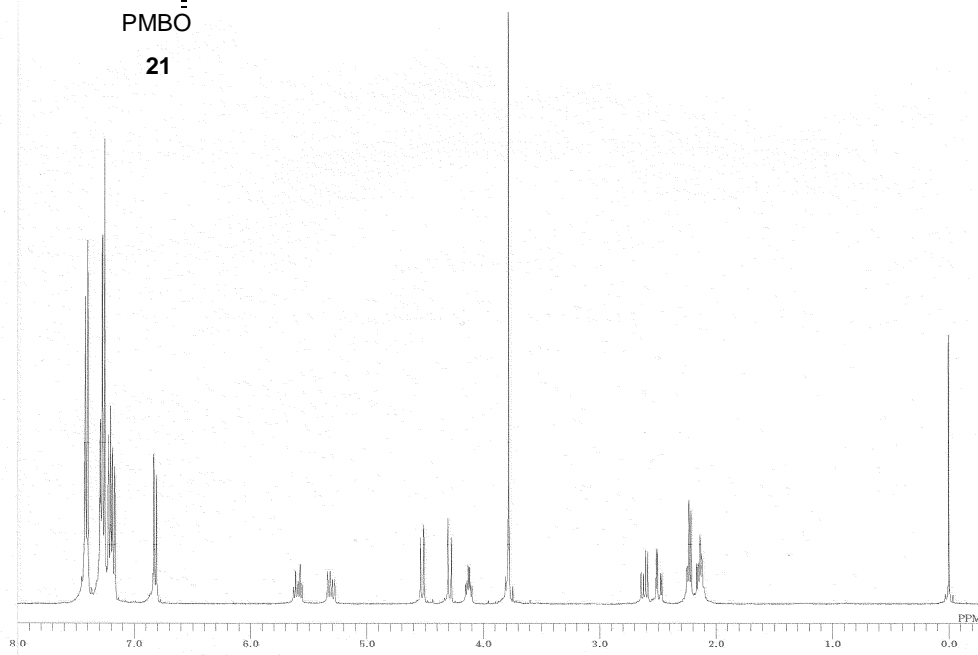

DFILE N-619RE.als  
COMNT N-619RE  
DATIM Mon Oct 29 19:25:14 2  
1H  
NON  
OBFRQ 399.65 MHz  
OBSET 124.00 KHz  
OBFIN 10500.00 Hz  
POINT 16384  
FREQU 7992.01 Hz  
SCANS 8  
ACQTM 2.0501 sec  
PD 4.9500 sec  
PWI 5.40 usec  
IRNUC 1H  
CTEMP 27.3 c  
SLVNT CDCL3  
EXREF 0.00 ppm  
BF 0.24 Hz  
RGAIN 15

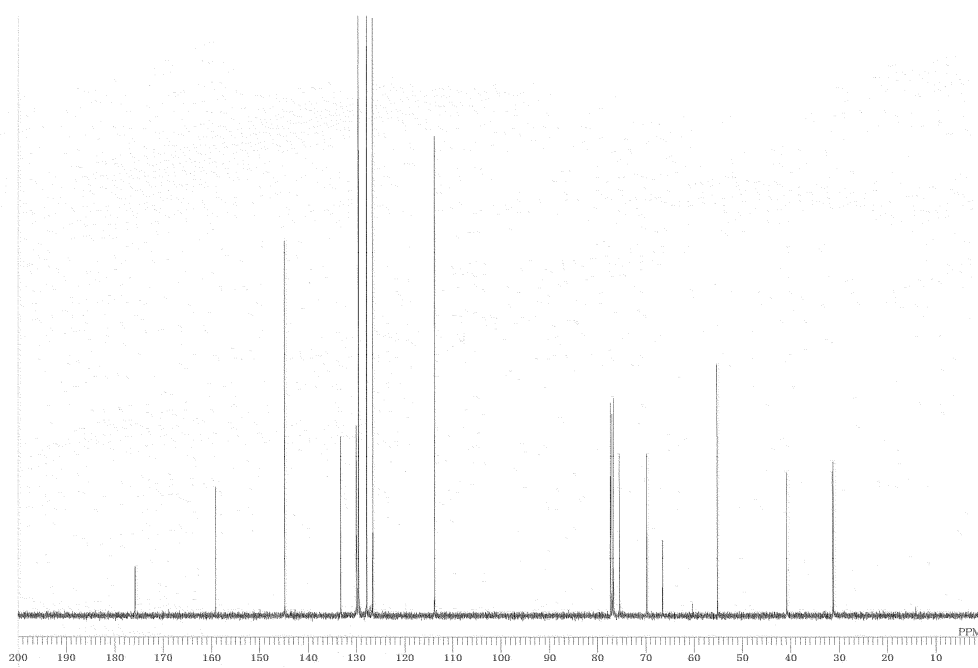

DFILE N-619 C-13.als  
COMNT N-619 C-13  
DATIM Sun Oct 28 15:28:56 2  
13C  
BCM  
OBFRQ 100.40 MHz  
OBSET 125.00 KHz  
OBFIN 10500.00 Hz  
POINT 32768  
FREQU 27118.64 Hz  
SCANS 622  
ACQTM 1.2083 sec  
PD 1.7920 sec  
PWI 5.60 usec  
IRNUC 1H  
CTEMP 25.3 c  
SLVNT CDCL3  
EXREF 77.00 ppm  
BF 0.24 Hz  
RGAIN 24

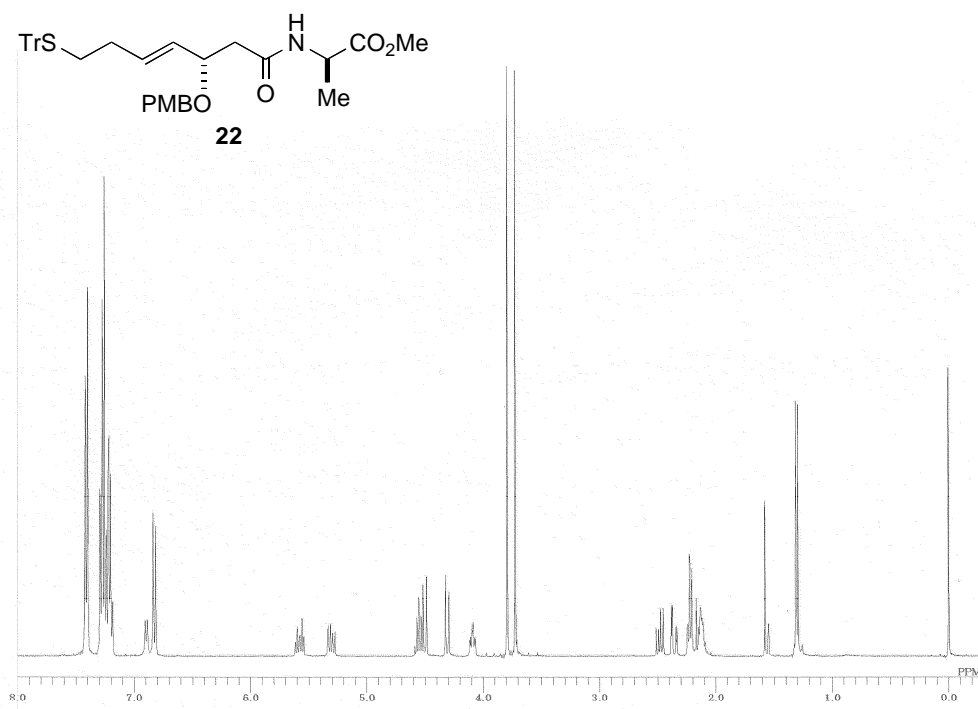

DFILE N-620 Jilia segment D-  
COMNT N-620  
DATIM Tue Oct 30 01:22:32 2  
OBNUC 1H  
EXMOD NOX  
OBFRQ 395.75 MHz  
OBSET 124.00 KHz  
OBFIN 10277.00 Hz  
POINT 16384  
FREQU 7912.96 Hz  
SCANS 8  
ACQTM 2.0705 sec  
PD 4.9290 sec  
PWL 5.20 usec  
IRNUC 1H  
CTEMP 24.5 c  
SLVNT CDCL3  
EXREF 0.00 ppm  
BF 0.20 Hz  
RGAIN 18

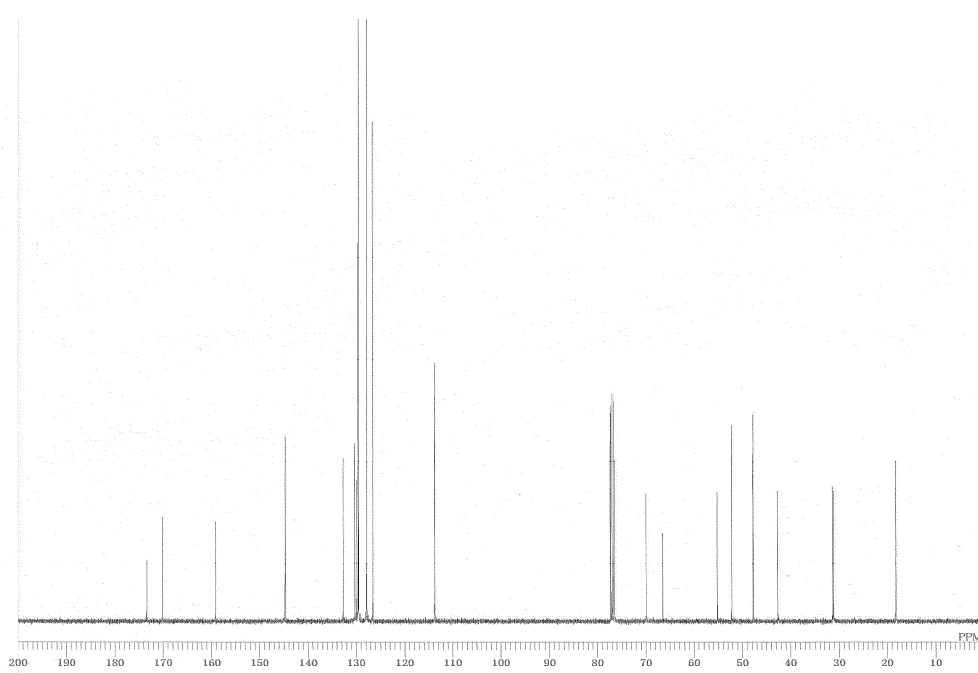

DFILE N-620 C-13 Jilia segm  
COMNT N-620 C-13  
DATIM Tue Oct 30 02:37:14 2  
OBNUC 13C  
EXMOD BCM  
OBFRQ 99.45 MHz  
OBSET 94.00 KHz  
OBFIN 10309.00 Hz  
POINT 32768  
FREQU 26845.64 Hz  
SCANS 1024  
ACQTM 1.2206 sec  
PD 1.7790 sec  
PWL 5.20 usec  
IRNUC 1H  
CTEMP 25.0 c  
SLVNT CDCL3  
EXREF 77.00 ppm  
BF 0.20 Hz  
RGAIN 23

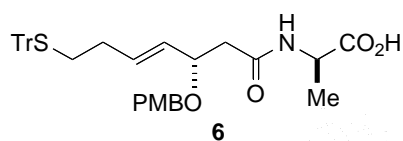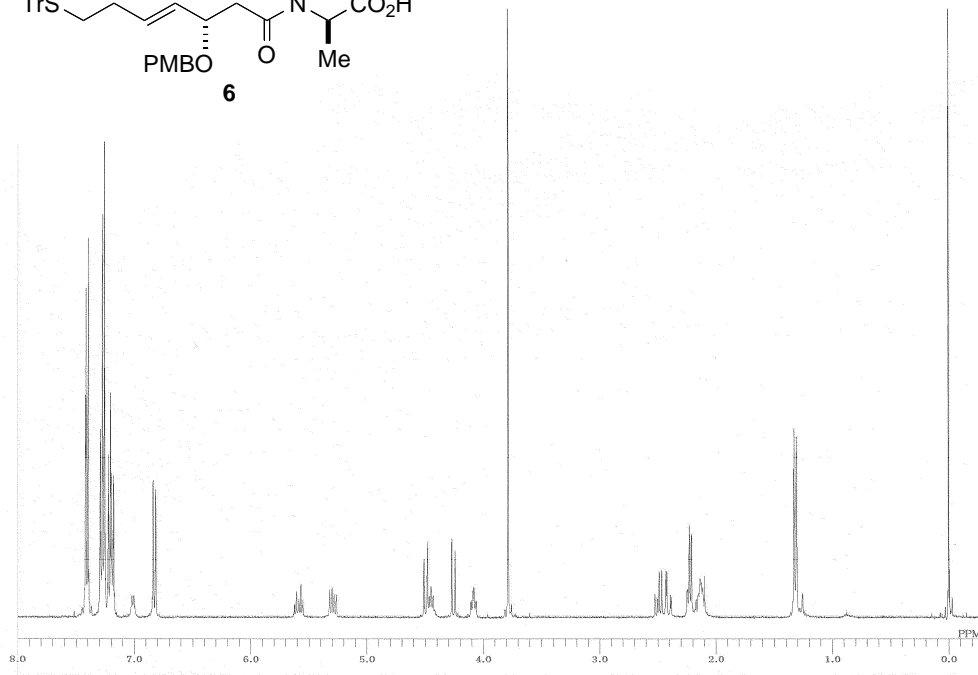

DFILE N-624 Julia D-Ala-OH  
COMNT N-624  
DATIM Wed Oct 31 21:01:15 2  
1H  
OBNUC  
EXMOD NON  
OBFRQ 399.65 MHz  
OBSET 124.00 KHz  
OBFIN 10500.00 Hz  
POINT 15384  
FREQU 7992.01 Hz  
SCANS 8  
ACQTM 2.9501 sec  
PD 4.9500 sec  
PWI 5.40 usec  
IRNUC 1H  
CTEMP 24.4 c  
SLVNT CDCL3  
EXREF 0.00 ppm  
BF 0.00 Hz  
RGAIN 20

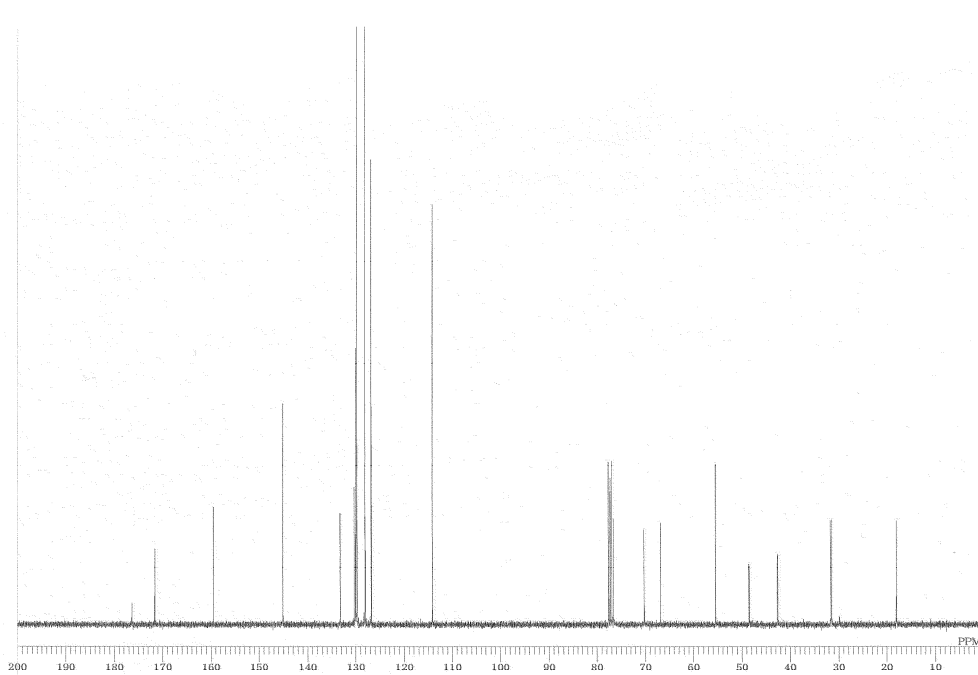

DFILE N-624 C-13 Julia D-A  
COMNT N-624 C-13  
DATIM Wed Oct 31 21:37:58 2  
13C  
OBNUC  
EXMOD BCM  
OBFRQ 100.40 MHz  
OBSET 125.00 KHz  
OBFIN 10500.00 Hz  
POINT 32768  
FREQU 27118.64 Hz  
SCANS 566  
ACQTM 1.2083 sec  
PD 1.7920 sec  
PWI 5.60 usec  
IRNUC 1H  
CTEMP 27.0 c  
SLVNT CDCL3  
EXREF 77.00 ppm  
BF 0.00 Hz  
RGAIN 23

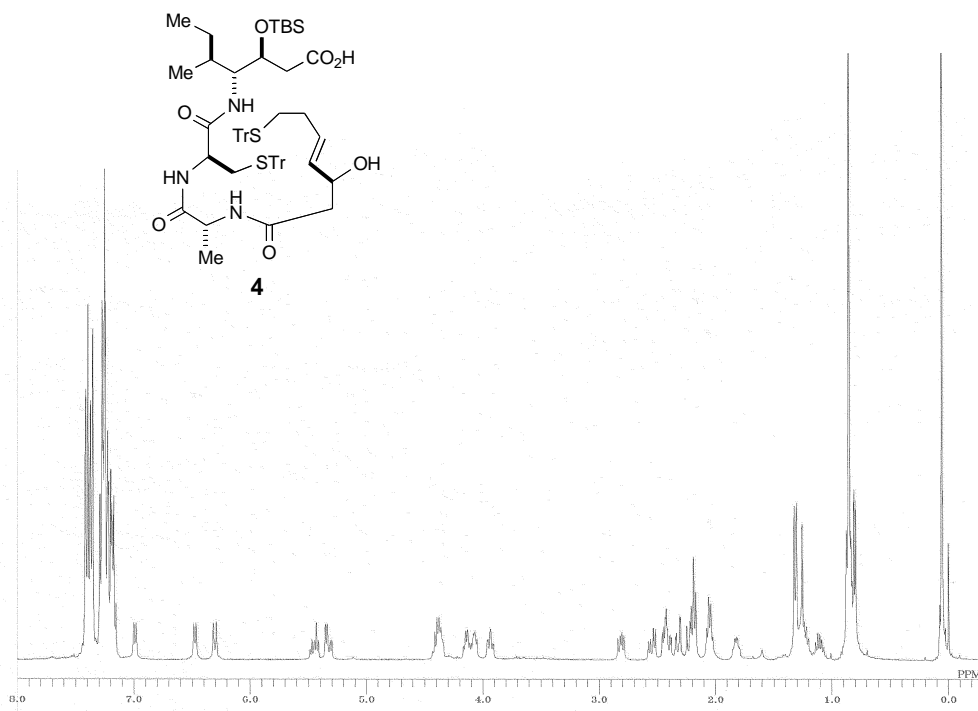

DFILE N-631 RE3 seco acid.a  
 COMNT N-631 RE3  
 DATIM Mon Nov 12 18:12:32  
 1H  
 EXMOD NOM  
 OBFRQ 399.65 MHz  
 OBSFET 124.00 KHz  
 OBFIN 10500.00 Hz  
 POINT 15364  
 FREQU 7992.01 Hz  
 SCANS 8  
 ACQTM 2.0501 sec  
 PD 4.9500 sec  
 PW1 5.40 usec  
 IRNUC 1H  
 CTEMP 22.4 c  
 SLVNT CDCL3  
 EXREF 0.00 ppm  
 BF 0.42 Hz  
 RGAIN 13

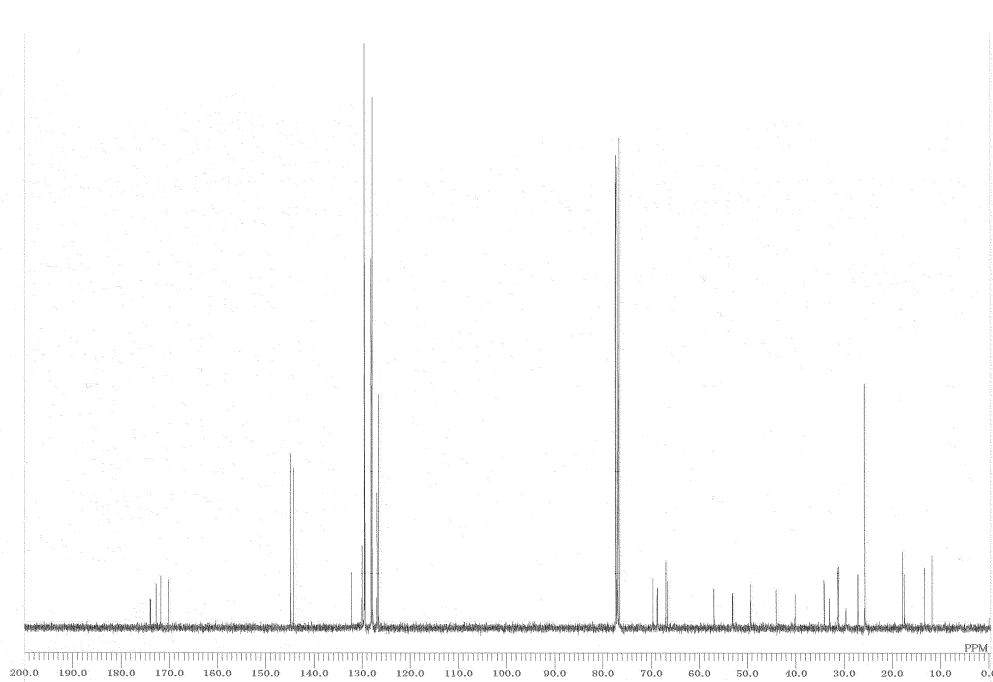

DFILE N-631 RE3 C-13 seco  
 COMNT N-631 RE3 C-13  
 DATIM Mon Nov 12 19:04:34  
 13C  
 EXMOD BCM  
 OBFRQ 100.40 MHz  
 OBSFET 125.00 KHz  
 OBFIN 10500.00 Hz  
 POINT 32768  
 FREQU 27118.64 Hz  
 SCANS 1024  
 ACQTM 1.2083 sec  
 PD 1.7920 sec  
 PW1 5.60 usec  
 IRNUC 1H  
 CTEMP 24.3 c  
 SLVNT CDCL3  
 EXREF 77.00 ppm  
 BF 0.42 Hz  
 RGAIN 23

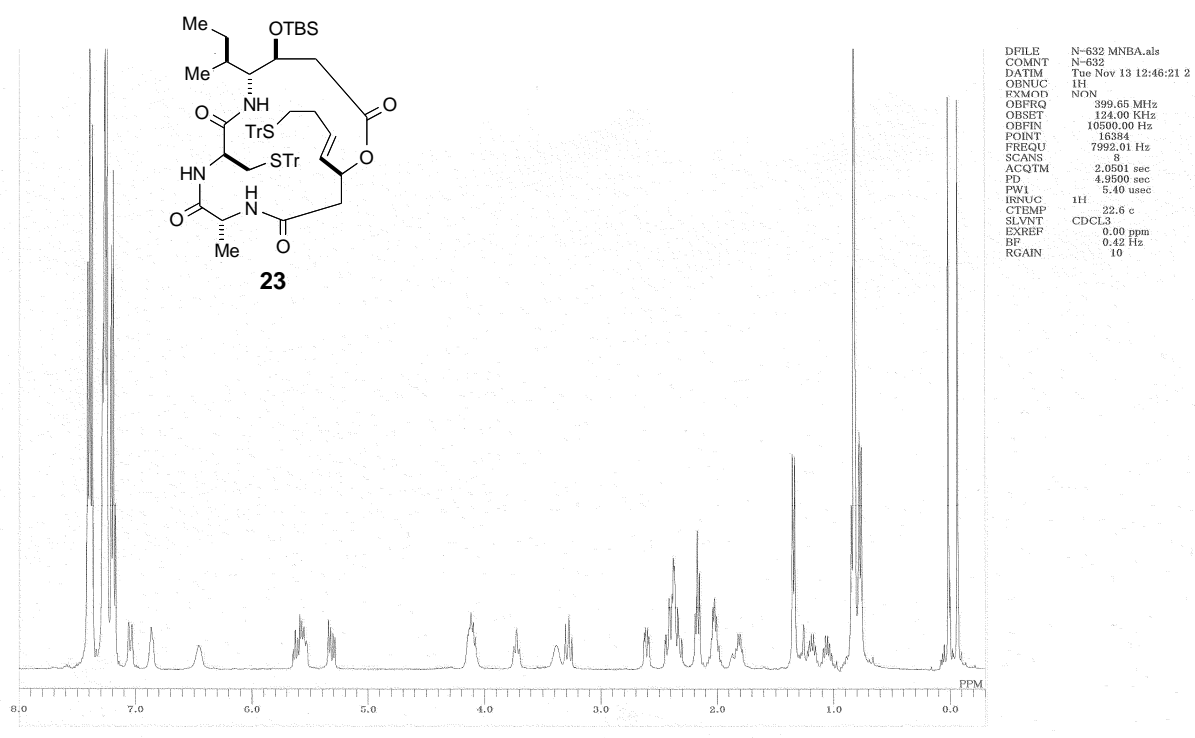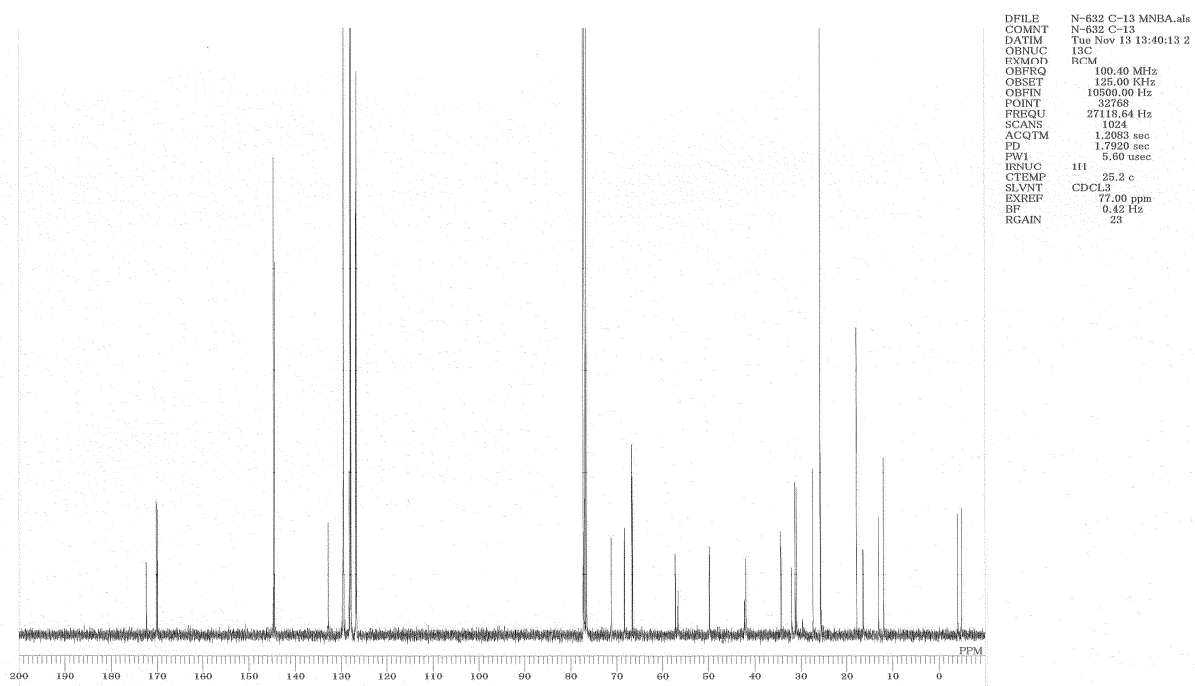

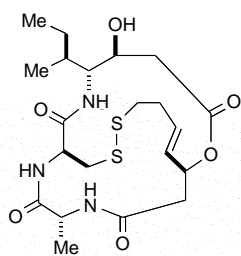

spiruchostatin B (2) (synthetic)

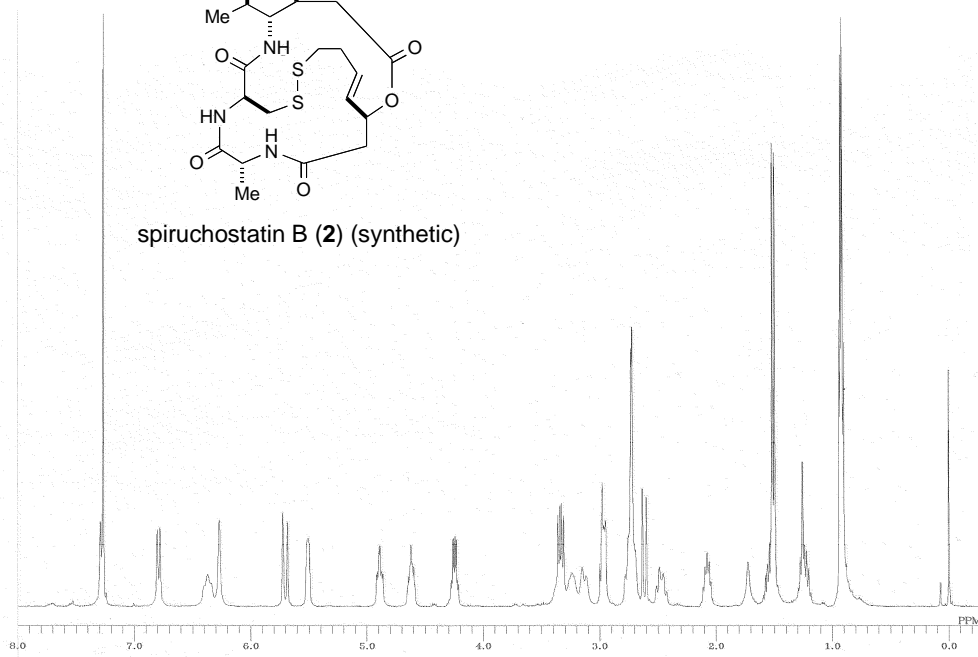

DFILE N-637 spiruchostatin B  
COMNT N-637  
DATIM Wed Nov 14 15:03:52  
OBNUC 1H  
PXMCD NON  
OBFREQ 399.65 MHz  
OBSET 124.00 KHz  
OBFIN 10500.00 Hz  
POINT 16384  
FREQU 7992.01 Hz  
SCANS 8  
ACQTM 2.0501 sec  
PD 4.9500 sec  
PWI 5.40 usec  
IRNUC III  
CTEMP 22.8 c  
SLVNT CDCL3  
EXREF 0.00 ppm  
BF 0.42 Hz  
RGAIN 14

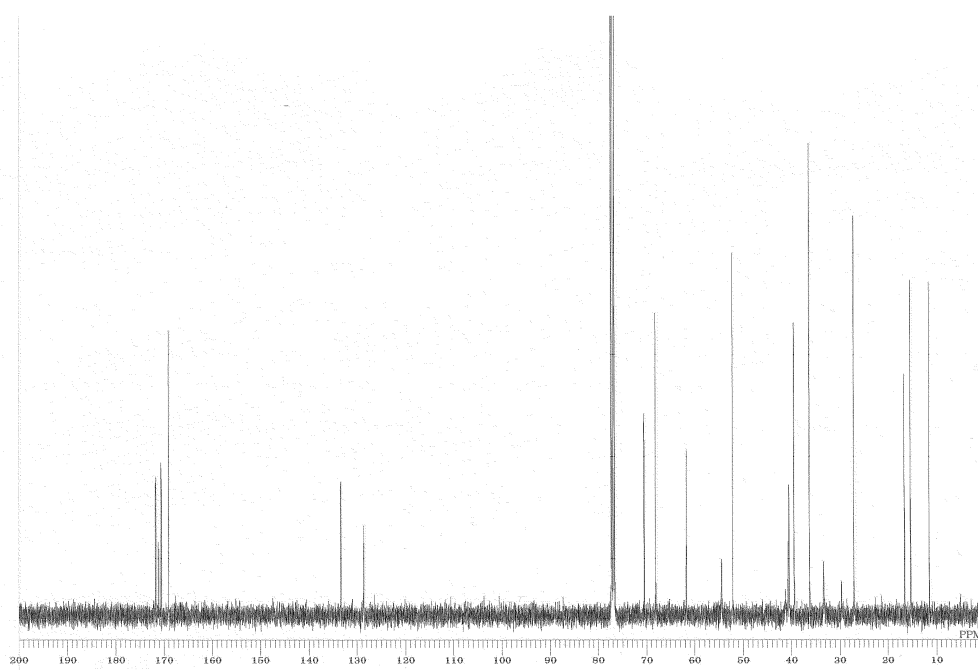

DFILE N-637 C-13 spiruchost  
COMNT N-637 C-13  
DATIM Wed Nov 14 16:55:46  
OBNUC 13C  
PXMCD BCM  
OBFREQ 100.40 MHz  
OBSET 125.00 KHz  
OBFIN 10500.00 Hz  
POINT 32768  
FREQU 27118.64 Hz  
SCANS 2201  
ACQTM 1.2083 sec  
PD 1.7920 sec  
PWI 5.60 usec  
IRNUC III  
CTEMP 25.0 c  
SLVNT CDCL3  
EXREF 77.00 ppm  
BF 0.42 Hz  
RGAIN 25

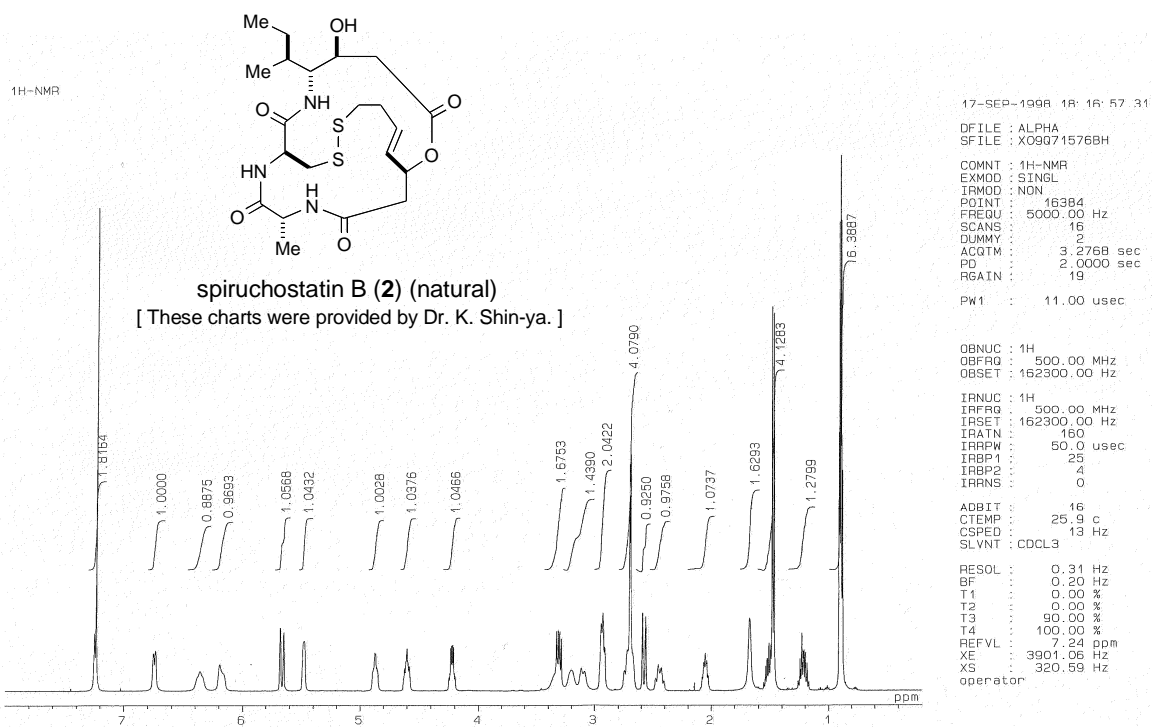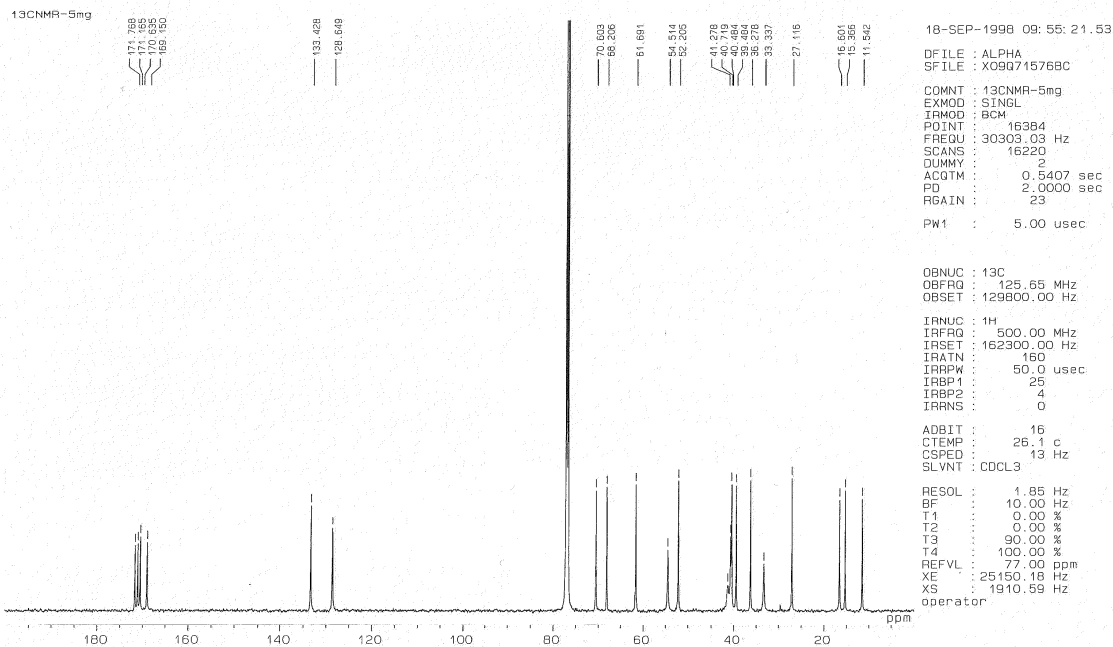



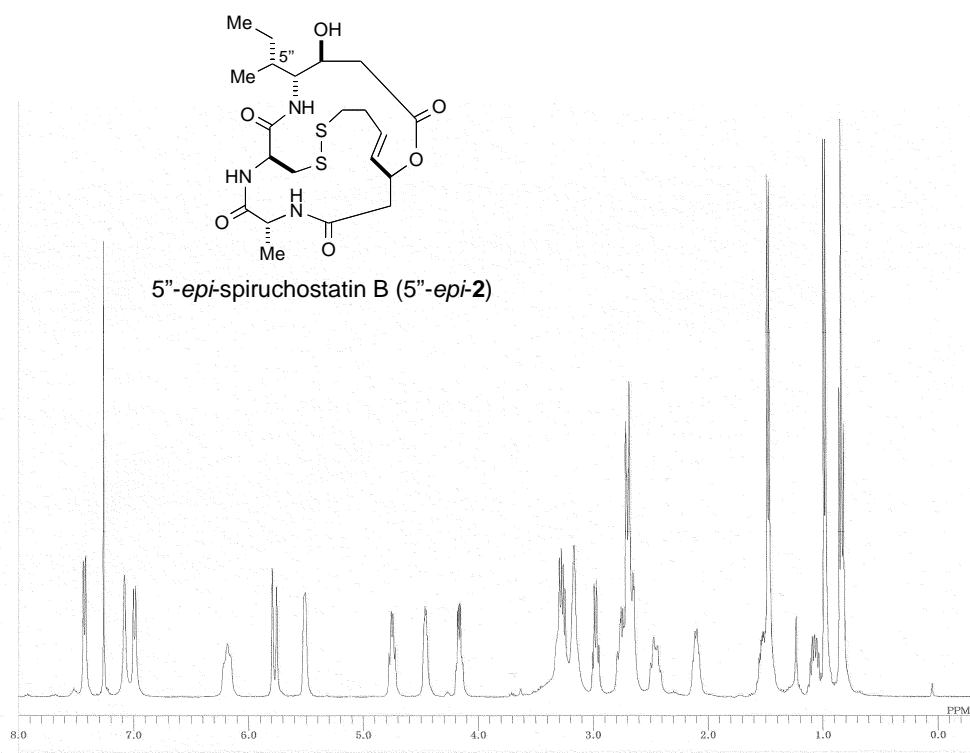

DFILE N-650 RERE AMPLE C  
COMNT N-650 RERE AMPLE C  
DATIM Sat Nov 24 18:06:04 21  
OBSNUC 1H  
EXMID NCHN  
OBFREQ 399.65 MHz  
OBSSET 124.00 KHz  
OBFIN 10500.00 Hz  
POINT 16384  
FREQU 7992.01 Hz  
SCANS 8  
ACQTM 2.0501 sec  
PD 4.9500 sec  
PWL 5.40 usec  
IRNUC 1H  
CTEMP 22.2 c  
SLVNT CDCL3  
EXREF 7.26 ppm  
BF 0.24 Hz  
RGAIN 11

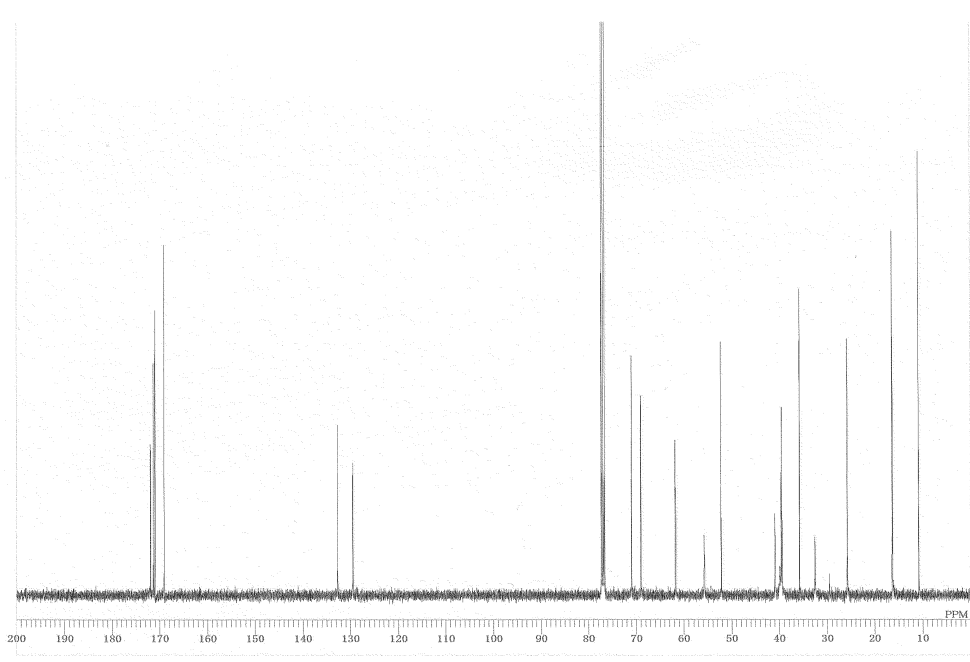

DFILE N-650 RERE AMPLE C  
COMNT N-650 RERE AMPLE C  
DATIM Sat Nov 24 18:51:07 21  
OBSNUC 13C  
EXMID BCSM  
OBFREQ 100.40 MHz  
OBSSET 125.00 KHz  
OBFIN 10500.00 Hz  
POINT 32768  
FREQU 27118.64 Hz  
SCANS 2048  
ACQTM 1.2083 sec  
PD 1.7920 sec  
PWL 5.60 usec  
IRNUC 1H  
CTEMP 24.6 c  
SLVNT CDCL3  
EXREF 77.00 ppm  
BF 0.24 Hz  
RGAIN 23
